# Supplementary material for: Genetic association between coffee consumption and multiple myeloma mediated by plasma metabolites: a Mendelian randomization study
Source: Royal Society of Chemistry journal article supplement (doi:10.1039/d4fo05696e), 2025-01-01
Supplement: d4fo05696e1.pdf [file d4fo05696e1.pdf]

**Figure S1. LOO analysis of the causal relationships between various coffee consumption and MM.**

**Figure S2. Scatter plots of the causal relationships between various coffee consumption and MM.**

**Figure S3. Flowchart of NHANES study.**
