# Supplementary material for: Genetic association between coffee consumption and multiple myeloma mediated by plasma metabolites: a Mendelian randomization study
Source: Royal Society of Chemistry journal article supplement (doi:10.1039/d4fo05696e), 2025-01-01

Figure S1

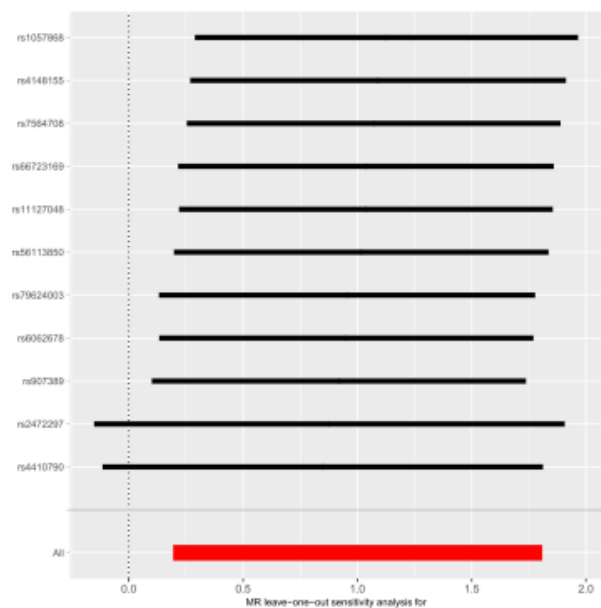

Coffee consumption

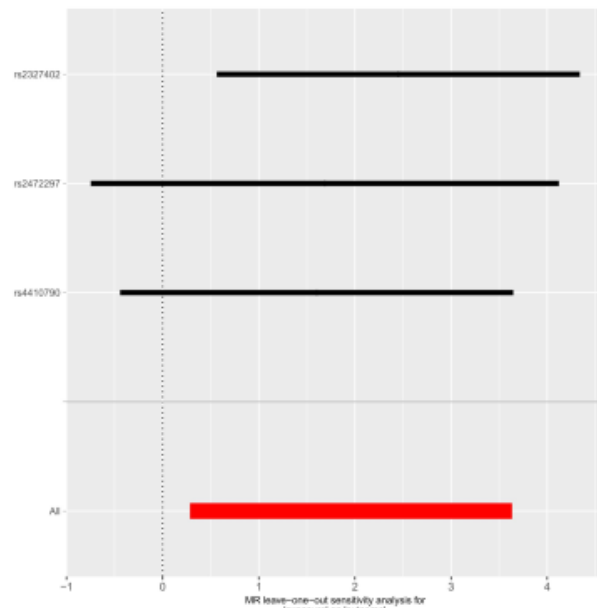

Decaffeinated coffee consumption

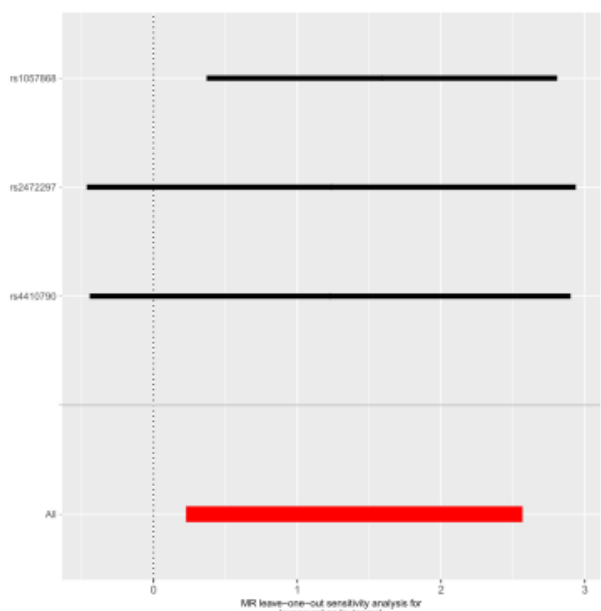

Ground coffee consumption

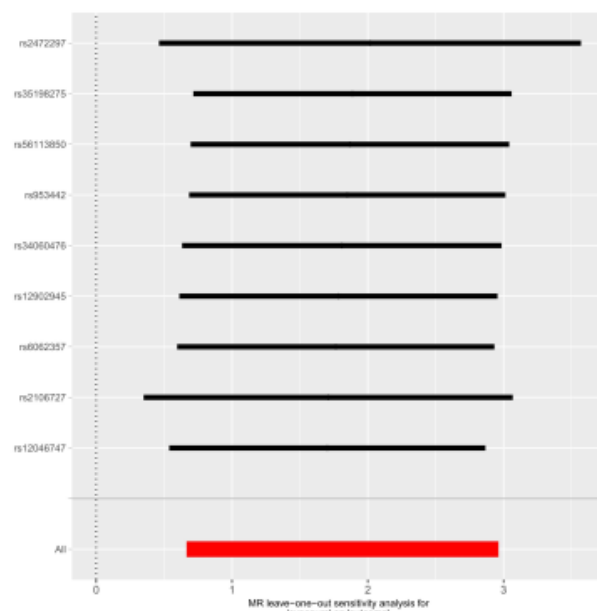

Instant coffee consumption

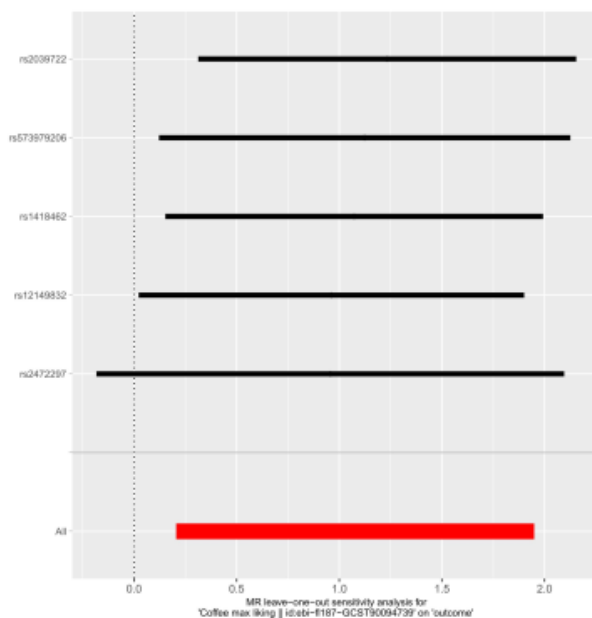

Coffee max liking

Figure S2

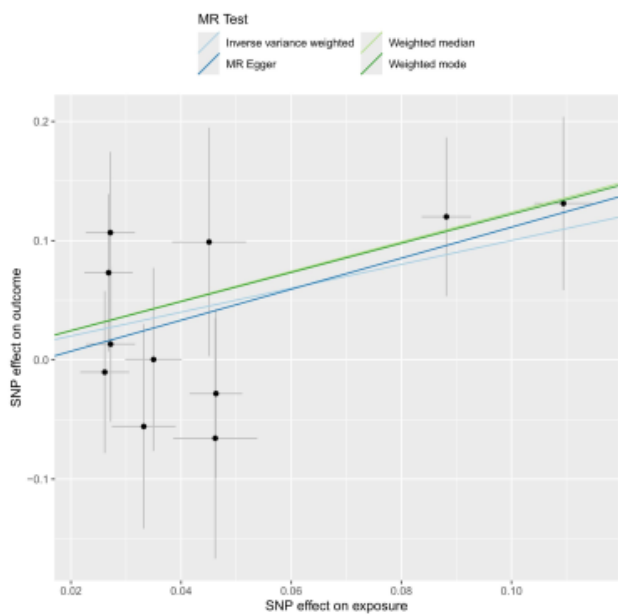

Coffee consumption

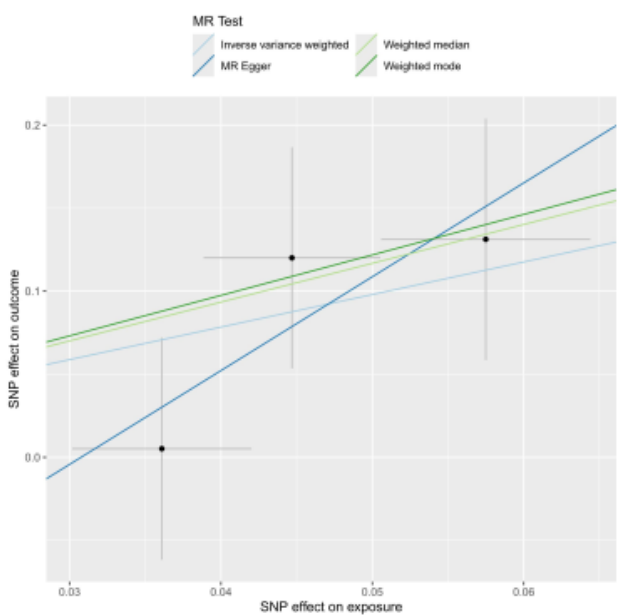

Decaffeinated coffee consumption

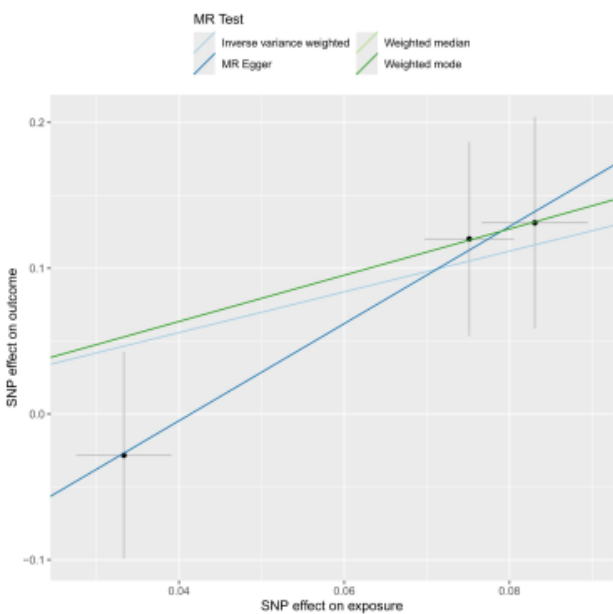

Ground coffee consumption

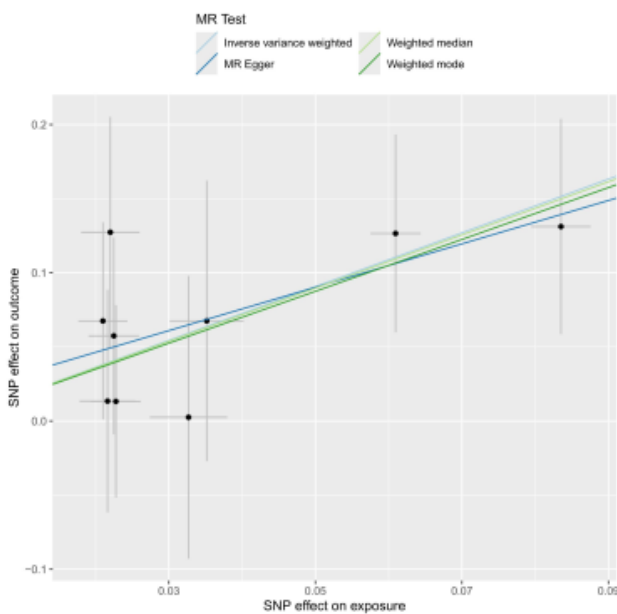

Instant coffee consumption

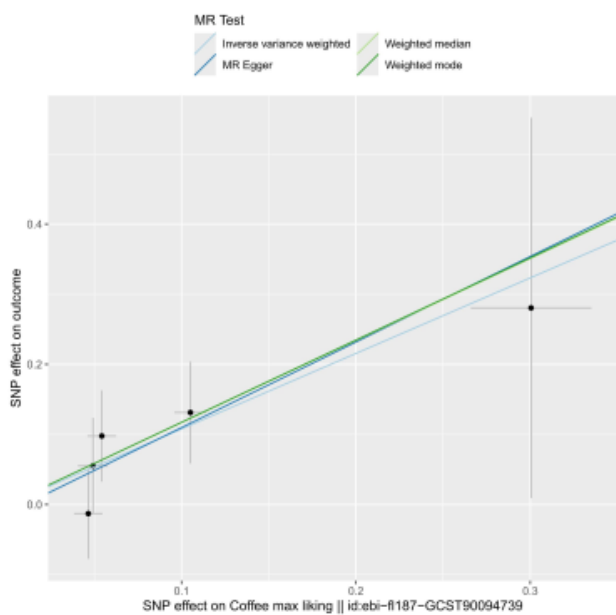

Coffee max liking

Figure S3

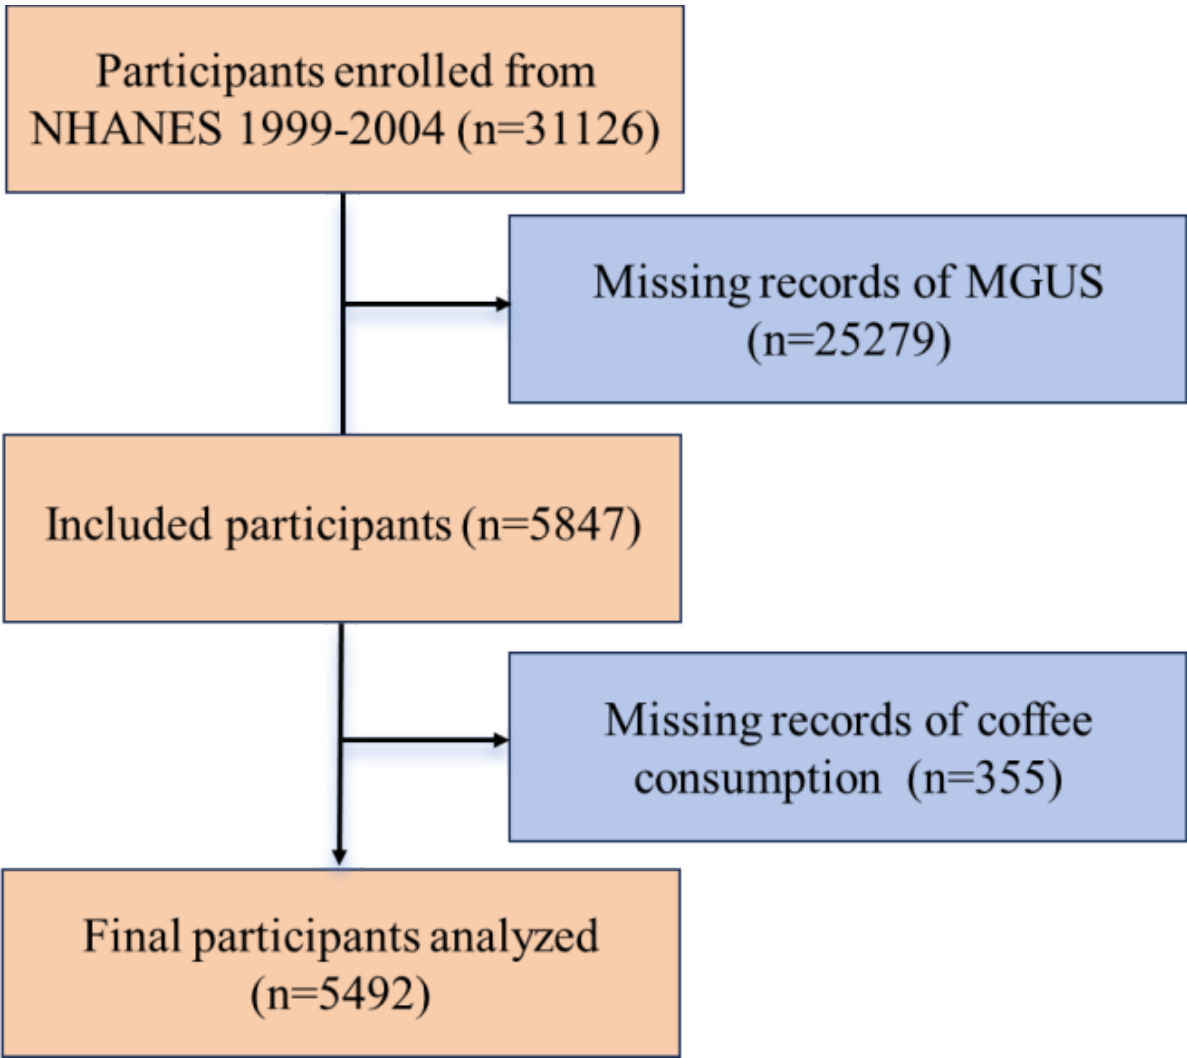

Supplement: d4fo05696e2.pdf [file d4fo05696e2.pdf]
