# Supplementary material for: Genetic association between coffee consumption and multiple myeloma mediated by plasma metabolites: a Mendelian randomization study
Source: Royal Society of Chemistry journal article supplement (doi:10.1039/d4fo05696e), 2025-01-01
Supplement: d4fo05696e3.xlsx [file d4fo05696e3.xlsx]

## Sheet: Table S1
Table S1. Information on genome-wide association studies (GWAS) of Mendelian randomization (MR) analyses among individuals of European ancestry
Phenotype	GWAS ID	No. of Cases	No. of Controls	Samplesize	Type	PMID	Dataset URL
Multiple myeloma	GCST90043910	488	455860	456348	Outcome	34737426	https://pubmed.ncbi.nlm.nih.gov/34737426/
Multiple myeloma	ukb-saige-204.4	552	404466	405018	Outcome	33568819	https://pubmed.ncbi.nlm.nih.gov/33568819/
Food intake	GCST90096892~GCST90096929	/	/	/	Exposure	35653391	https://pubmed.ncbi.nlm.nih.gov/35653391/
Food liking	GCST90094687~GCST90094873	/	/	/	Exposure	35585065	https://pubmed.ncbi.nlm.nih.gov/35585065/
Plasma metabolites	GCST90199621~GCST90201020	/	/	/	Mediator	36635386	https://pubmed.ncbi.nlm.nih.gov/36635386/
Blood and urine biomarkers	Ukb-bub35	/	/	/	Mediator	33462484	https://pubmed.ncbi.nlm.nih.gov/33462484/
Cerebrospinal fluid metabolomics	GCST90025999~GCST90026336	/	/	/	Mediator	33437055	https://pubmed.ncbi.nlm.nih.gov/33437055/
Plasma lipidome	GCST90277238~GCST90277416	/	/	/	Mediator	37907536	https://pubmed.ncbi.nlm.nih.gov/37907536/

## Sheet: Table S2
Table S2. Summary statistics of instrumental variables (IVs) for the significant associations between diet and multiple myeloma(MM) identified in primary Mendelian randomization (MR) analyses
id	Exposure	Outcome	IV	Chr	Position (HG19)	Effects on exposure				Effects on outcome
						Effect allele	Other allele	Beta	SE	Effect allele	Other allele	Beta	SE
Food intake
ebi-fi38-GCST90096894	Coffee consumption	GCST90043910	rs1057868	7	75615006	C	T	-0.0463312	0.00477506	C	T	0.0282653	0.0708977
ebi-fi38-GCST90096894	Coffee consumption	GCST90043910	rs11127048	2	27752463	G	A	-0.0261299	0.00442101	G	A	0.0102791	0.0678986
ebi-fi38-GCST90096894	Coffee consumption	GCST90043910	rs2472297	15	75027880	C	T	-0.10944	0.0053028	C	T	-0.131197	0.0726176
ebi-fi38-GCST90096894	Coffee consumption	GCST90043910	rs4148155	4	89054667	A	G	0.0461983	0.00762331	A	G	-0.0657066	0.100937
ebi-fi38-GCST90096894	Coffee consumption	GCST90043910	rs4410790	7	17284577	T	C	-0.088183	0.0044791	T	C	-0.120049	0.0665383
ebi-fi38-GCST90096894	Coffee consumption	GCST90043910	rs56113850	19	41353107	T	C	-0.0271952	0.00444034	T	C	-0.0132347	0.0649339
ebi-fi38-GCST90096894	Coffee consumption	GCST90043910	rs6062678	20	62888802	G	T	-0.0268256	0.00439387	G	T	-0.0731391	0.0660032
ebi-fi38-GCST90096894	Coffee consumption	GCST90043910	rs66723169	18	57808978	C	A	-0.0349865	0.00513561	C	A	-0.000356295	0.0767854
ebi-fi38-GCST90096894	Coffee consumption	GCST90043910	rs7564708	2	639055	T	C	-0.0332124	0.00579664	T	C	0.0558184	0.0857392
ebi-fi38-GCST90096894	Coffee consumption	GCST90043910	rs79624003	7	73012785	A	G	-0.0450819	0.00672232	A	G	-0.0988993	0.0957872
ebi-fi38-GCST90096894	Coffee consumption	GCST90043910	rs907389	15	77897476	A	C	0.027158	0.00446296	A	C	0.106748	0.0676745
ebi-fi38-GCST90096908	Decaffeinated coffee consumption	GCST90043910	rs2327402	20	11345395	G	A	-0.036092	0.00591878	G	A	-0.00516912	0.0668049
ebi-fi38-GCST90096908	Decaffeinated coffee consumption	GCST90043910	rs2472297	15	75027880	C	T	-0.057493	0.00690825	C	T	-0.131197	0.0726176
ebi-fi38-GCST90096908	Decaffeinated coffee consumption	GCST90043910	rs4410790	7	17284577	T	C	-0.044687	0.0058346	T	C	-0.120049	0.0665383
ebi-fi38-GCST90096913	Ground coffee consumption	GCST90043910	rs1057868	7	75615006	C	T	-0.0333232	0.0057577	C	T	0.0282653	0.0708977
ebi-fi38-GCST90096913	Ground coffee consumption	GCST90043910	rs2472297	15	75027880	C	T	-0.083074	0.00639815	C	T	-0.131197	0.0726176
ebi-fi38-GCST90096913	Ground coffee consumption	GCST90043910	rs4410790	7	17284577	T	C	-0.0751383	0.00540239	T	C	-0.120049	0.0665383
ebi-fi38-GCST90096914	Instant coffee consumption	GCST90043910	rs12046747	1	204593696	G	A	0.0220105	0.0039831	G	A	0.127358	0.0778372
ebi-fi38-GCST90096914	Instant coffee consumption	GCST90043910	rs12902945	15	74317707	G	T	-0.0224888	0.00344207	G	T	-0.0574596	0.0664115
ebi-fi38-GCST90096914	Instant coffee consumption	GCST90043910	rs2106727	7	17287998	A	G	-0.0609431	0.00342275	A	G	-0.126552	0.0666868
ebi-fi38-GCST90096914	Instant coffee consumption	GCST90043910	rs2472297	15	75027880	C	T	-0.083522	0.00404563	C	T	-0.131197	0.0726176
ebi-fi38-GCST90096914	Instant coffee consumption	GCST90043910	rs34060476	7	73037956	A	G	-0.0351674	0.00505082	A	G	-0.067548	0.0946387
ebi-fi38-GCST90096914	Instant coffee consumption	GCST90043910	rs35198275	3	50536092	A	G	0.0326836	0.00528347	A	G	0.00251579	0.0953338
ebi-fi38-GCST90096914	Instant coffee consumption	GCST90043910	rs56113850	19	41353107	T	C	-0.0227682	0.00338495	T	C	-0.0132347	0.0649339
ebi-fi38-GCST90096914	Instant coffee consumption	GCST90043910	rs6062357	20	62892739	C	T	-0.0209942	0.00334344	C	T	-0.0675143	0.0664961
ebi-fi38-GCST90096914	Instant coffee consumption	GCST90043910	rs953442	18	57797485	T	C	-0.0216302	0.00381741	T	C	-0.0134335	0.0751113
Food intake
ebi-fi38-GCST90096894	Coffee consumption	ukb-saige-204.4	rs1057868	7	75615006	C	T	-0.0463312	0.00477506	C	T	0.021	0.067
ebi-fi38-GCST90096894	Coffee consumption	ukb-saige-204.4	rs2472297	15	75027880	C	T	-0.10944	0.0053028	C	T	-0.099	0.068
ebi-fi38-GCST90096894	Coffee consumption	ukb-saige-204.4	rs4148155	4	89054667	A	G	0.0461983	0.00762331	A	G	-0.11	0.095
ebi-fi38-GCST90096894	Coffee consumption	ukb-saige-204.4	rs4410790	7	17284577	T	C	-0.088183	0.0044791	T	C	-0.068	0.063
ebi-fi38-GCST90096894	Coffee consumption	ukb-saige-204.4	rs56113850	19	41353107	T	C	-0.0271952	0.00444034	T	C	-0.09	0.061
ebi-fi38-GCST90096894	Coffee consumption	ukb-saige-204.4	rs6062678	20	62888802	G	T	-0.0268256	0.00439387	G	T	-0.12	0.061
ebi-fi38-GCST90096894	Coffee consumption	ukb-saige-204.4	rs66723169	18	57808978	C	A	-0.0349865	0.00513561	C	A	0.021	0.072
ebi-fi38-GCST90096894	Coffee consumption	ukb-saige-204.4	rs79624003	7	73012785	A	G	-0.0450819	0.00672232	A	G	-0.074	0.09
ebi-fi38-GCST90096894	Coffee consumption	ukb-saige-204.4	rs907389	15	77897476	A	C	0.027158	0.00446296	A	C	0.12	0.063
ebi-fi38-GCST90096914	Instant coffee consumption	ukb-saige-204.4	rs12046747	1	204593696	G	A	0.0220105	0.0039831	G	A	0.11	0.073
ebi-fi38-GCST90096914	Instant coffee consumption	ukb-saige-204.4	rs12902945	15	74317707	G	T	-0.0224888	0.00344207	G	T	-0.038	0.062
ebi-fi38-GCST90096914	Instant coffee consumption	ukb-saige-204.4	rs2106727	7	17287998	A	G	-0.0609431	0.00342275	A	G	-0.071	0.063
ebi-fi38-GCST90096914	Instant coffee consumption	ukb-saige-204.4	rs2472297	15	75027880	C	T	-0.083522	0.00404563	C	T	-0.099	0.068
ebi-fi38-GCST90096914	Instant coffee consumption	ukb-saige-204.4	rs34060476	7	73037956	A	G	-0.0351674	0.00505082	A	G	-0.059	0.089
ebi-fi38-GCST90096914	Instant coffee consumption	ukb-saige-204.4	rs35198275	3	50536092	A	G	0.0326836	0.00528347	A	G	0.065	0.089
ebi-fi38-GCST90096914	Instant coffee consumption	ukb-saige-204.4	rs56113850	19	41353107	T	C	-0.0227682	0.00338495	T	C	-0.09	0.061
ebi-fi38-GCST90096914	Instant coffee consumption	ukb-saige-204.4	rs6062357	20	62892739	C	T	-0.0209942	0.00334344	C	T	-0.12	0.061
ebi-fi38-GCST90096914	Instant coffee consumption	ukb-saige-204.4	rs953442	18	57797485	T	C	-0.0216302	0.00381741	T	C	0.012	0.07
Food liking
ebi-fl187-GCST90094695	Bacon liking	GCST90043910	rs10946808	6	26233387	G	A	-0.053403	0.008825	G	A	0.0713969	0.0718949
ebi-fl187-GCST90094695	Bacon liking	GCST90043910	rs1194320	7	113878371	C	G	0.0467	0.008411	C	G	-0.035688	0.0686992
ebi-fl187-GCST90094695	Bacon liking	GCST90043910	rs429358	19	45411941	C	T	-0.09342	0.011114	C	T	0.140818	0.0888287
ebi-fl187-GCST90094695	Bacon liking	GCST90043910	rs6718656	2	206965837	G	T	-0.046135	0.007911	G	T	0.0708699	0.0644333
ebi-fl187-GCST90094727	Cauliflower liking	GCST90043910	rs1170216	3	86379896	G	A	-0.061967	0.010393	G	A	0.103686	0.109368
ebi-fl187-GCST90094727	Cauliflower liking	GCST90043910	rs13135092	4	103198082	G	A	0.064725	0.011309	G	A	-0.180911	0.117005
ebi-fl187-GCST90094727	Cauliflower liking	GCST90043910	rs4310746	13	56012679	G	A	-0.047482	0.006871	G	A	0.060858	0.0716488
ebi-fl187-GCST90094727	Cauliflower liking	GCST90043910	rs6808550	3	25107866	G	A	0.034196	0.006222	G	A	-0.0701544	0.0652354
ebi-fl187-GCST90094739	Coffee max liking	GCST90043910	rs12149832	16	53842908	A	G	0.054224	0.008241	A	G	0.0977206	0.0650067
ebi-fl187-GCST90094739	Coffee max liking	GCST90043910	rs1418462	1	96289021	T	A	0.049161	0.008635	T	A	0.0550508	0.06846
ebi-fl187-GCST90094739	Coffee max liking	GCST90043910	rs2039722	6	98314912	G	A	0.046467	0.008135	G	A	-0.0129971	0.0643473
ebi-fl187-GCST90094739	Coffee max liking	GCST90043910	rs2472297	15	75027880	T	C	0.105058	0.009179	T	C	0.131197	0.0726176
ebi-fl187-GCST90094739	Coffee max liking	GCST90043910	rs573979206	22	24712801	T	C	-0.300491	0.034597	T	C	-0.280481	0.271376
ebi-fl187-GCST90094760	F-fatty/dairy food liking (derived food-liking factor)	GCST90043910	rs2409764	8	11281273	G	A	0.0751097	0.0133819	G	A	0.0452832	0.0661797
ebi-fl187-GCST90094760	F-fatty/dairy food liking (derived food-liking factor)	GCST90043910	rs2733520	3	17246392	A	G	0.075413	0.0133788	A	G	-0.151852	0.0645405
ebi-fl187-GCST90094760	F-fatty/dairy food liking (derived food-liking factor)	GCST90043910	rs710360	5	87144026	G	C	-0.0984456	0.0154071	G	C	0.0598016	0.0754698
ebi-fl187-GCST90094760	F-fatty/dairy food liking (derived food-liking factor)	GCST90043910	rs7652808	3	85603643	G	T	-0.0777121	0.0139469	G	T	0.0534482	0.0671321
ebi-fl187-GCST90094760	F-fatty/dairy food liking (derived food-liking factor)	GCST90043910	rs814573	19	45424351	T	A	-0.172315	0.0172938	T	A	0.221654	0.0856738
ebi-fl187-GCST90094765	Fried fish liking	GCST90043910	rs13232861	7	97929081	G	A	0.055542	0.009998	G	A	0.0374681	0.0824992
ebi-fl187-GCST90094765	Fried fish liking	GCST90043910	rs2150344	14	28467571	C	G	0.085963	0.015683	C	G	0.221609	0.128763
ebi-fl187-GCST90094765	Fried fish liking	GCST90043910	rs2945319	8	8088933	C	T	-0.05449	0.007938	C	T	-0.0517026	0.065755
ebi-fl187-GCST90094765	Fried fish liking	GCST90043910	rs601338	19	49206674	A	G	-0.062088	0.007791	A	G	-0.0441178	0.0640213
ebi-fl187-GCST90094765	Fried fish liking	GCST90043910	rs79288427	1	21441998	T	C	-0.075198	0.010621	T	C	-0.184382	0.0881033
ebi-fl187-GCST90094799	F-meat liking (derived food-liking factor)	GCST90043910	rs1006945	20	37458009	T	G	-0.0674092	0.0120056	T	G	0.00442687	0.064227
ebi-fl187-GCST90094799	F-meat liking (derived food-liking factor)	GCST90043910	rs11911432	21	34370555	G	T	0.0804206	0.0142567	G	T	-0.0491597	0.0766561
ebi-fl187-GCST90094799	F-meat liking (derived food-liking factor)	GCST90043910	rs186775337	2	206956260	C	T	-0.0751178	0.012238	C	T	0.0987783	0.0670498
ebi-fl187-GCST90094799	F-meat liking (derived food-liking factor)	GCST90043910	rs2733481	3	17320397	A	G	0.0709336	0.0120434	A	G	-0.155453	0.0644538
ebi-fl187-GCST90094799	F-meat liking (derived food-liking factor)	GCST90043910	rs429358	19	45411941	C	T	-0.166912	0.0168469	C	T	0.140818	0.0888287
ebi-fl187-GCST90094799	F-meat liking (derived food-liking factor)	GCST90043910	rs61880662	11	30901989	G	A	-0.0923115	0.0168236	G	A	0.0433505	0.0955811
ebi-fl187-GCST90094799	F-meat liking (derived food-liking factor)	GCST90043910	rs72614026	8	143403979	C	T	0.157301	0.0277057	C	T	-0.00481714	0.147923
ebi-fl187-GCST90094799	F-meat liking (derived food-liking factor)	GCST90043910	rs75189942	3	62428323	T	C	-0.147684	0.0266528	T	C	0.0996723	0.148184
ebi-fl187-GCST90094799	F-meat liking (derived food-liking factor)	GCST90043910	rs76395182	3	85547337	G	T	-0.0834494	0.0125396	G	T	0.0748168	0.0693885
ebi-fl187-GCST90094799	F-meat liking (derived food-liking factor)	GCST90043910	rs8083301	18	21078579	T	A	-0.0775902	0.0125567	T	A	0.0884592	0.0686328
ebi-fl187-GCST90094799	F-meat liking (derived food-liking factor)	GCST90043910	rs9393688	6	26207174	T	A	-0.08098	0.0135926	T	A	0.0581999	0.0734251
ebi-fl187-GCST90094815	Porridge liking	GCST90043910	rs10460644	20	15768237	A	G	-0.051528	0.008302	A	G	-0.0224212	0.066429
ebi-fl187-GCST90094815	Porridge liking	GCST90043910	rs10789340	1	72940273	G	A	0.050313	0.0083	G	A	-0.0132081	0.0665676
ebi-fl187-GCST90094815	Porridge liking	GCST90043910	rs1593062	5	87133304	C	T	0.058202	0.009931	C	T	0.0334726	0.0798767
ebi-fl187-GCST90094815	Porridge liking	GCST90043910	rs206307	3	162493820	A	T	0.062355	0.008264	A	T	0.0527752	0.0660091
ebi-fl187-GCST90094815	Porridge liking	GCST90043910	rs4881868	11	51566044	C	G	-0.07376	0.013201	C	G	-0.0412873	0.10485
ebi-fl187-GCST90094815	Porridge liking	GCST90043910	rs501593	11	90147366	C	T	-0.047228	0.008252	C	T	-0.0844735	0.0661351
ebi-fl187-GCST90094815	Porridge liking	GCST90043910	rs55872725	16	53809123	T	C	0.101505	0.008191	T	C	0.0677493	0.0652584
ebi-fl187-GCST90094815	Porridge liking	GCST90043910	rs7356565	5	164755174	A	G	0.044367	0.008089	A	G	0.100034	0.0648659
ebi-fl187-GCST90094815	Porridge liking	GCST90043910	rs8005245	14	20586042	C	G	-0.052104	0.008175	C	G	-0.00823409	0.0652585
ebi-fl187-GCST90094815	Porridge liking	GCST90043910	rs9954833	18	40810376	T	C	-0.04835	0.008445	T	C	-0.0341844	0.0675201
ebi-fl187-GCST90094838	Shellfish liking	GCST90043910	rs1073242	13	58715219	A	G	0.06448	0.010873	A	G	0.0214836	0.0669623
ebi-fl187-GCST90094838	Shellfish liking	GCST90043910	rs1087692	3	12120453	G	A	0.088254	0.01518	G	A	0.078452	0.0916486
ebi-fl187-GCST90094838	Shellfish liking	GCST90043910	rs10955643	8	114083585	T	G	0.068202	0.010759	T	G	0.08881	0.0652357
ebi-fl187-GCST90094838	Shellfish liking	GCST90043910	rs1123321	16	83677410	G	C	0.114514	0.012152	G	C	0.0708324	0.0740776
ebi-fl187-GCST90094838	Shellfish liking	GCST90043910	rs114741460	6	32594384	T	C	-0.176089	0.026782	T	C	-0.100802	0.183364
ebi-fl187-GCST90094838	Shellfish liking	GCST90043910	rs12111981	7	78919199	A	T	-0.070375	0.011474	A	T	-0.0362672	0.0696609
ebi-fl187-GCST90094838	Shellfish liking	GCST90043910	rs12439895	15	67707001	T	A	-0.08139	0.012408	T	A	-0.105575	0.0768217
ebi-fl187-GCST90094838	Shellfish liking	GCST90043910	rs142605378	4	139426721	A	G	-0.079208	0.013933	A	G	-0.237942	0.084698
ebi-fl187-GCST90094838	Shellfish liking	GCST90043910	rs2110529	2	59497127	C	T	-0.078774	0.010625	C	T	-0.0620789	0.0646372
ebi-fl187-GCST90094838	Shellfish liking	GCST90043910	rs2236295	10	64564892	T	G	0.075235	0.010829	T	G	-0.12971	0.0658893
ebi-fl187-GCST90094838	Shellfish liking	GCST90043910	rs2457263	9	15599350	A	C	-0.083725	0.010587	A	C	0.00440592	0.0644972
ebi-fl187-GCST90094838	Shellfish liking	GCST90043910	rs2526389	3	50192826	T	C	0.05924	0.010724	T	C	-0.0374573	0.0650611
ebi-fl187-GCST90094838	Shellfish liking	GCST90043910	rs3731769	2	162107295	T	G	0.066886	0.011615	T	G	-0.135334	0.07061
ebi-fl187-GCST90094838	Shellfish liking	GCST90043910	rs3909727	11	126587382	G	A	0.081331	0.014336	G	A	0.0282441	0.0868756
ebi-fl187-GCST90094838	Shellfish liking	GCST90043910	rs427576	16	73829270	C	A	-0.06123	0.010553	C	A	-0.0428645	0.0640061
ebi-fl187-GCST90094838	Shellfish liking	GCST90043910	rs4451769	12	60829905	A	G	0.068743	0.012555	A	G	0.0382013	0.0762816
ebi-fl187-GCST90094838	Shellfish liking	GCST90043910	rs4552632	5	164574688	A	G	0.070602	0.010913	A	G	0.0758985	0.066383
ebi-fl187-GCST90094838	Shellfish liking	GCST90043910	rs461609	5	102447305	A	G	0.063123	0.011551	A	G	0.0849016	0.0703558
ebi-fl187-GCST90094838	Shellfish liking	GCST90043910	rs5020205	9	3971439	C	G	-0.066503	0.011205	C	G	0.108211	0.0680356
ebi-fl187-GCST90094838	Shellfish liking	GCST90043910	rs56094641	16	53806453	G	A	0.079094	0.010796	G	A	0.0722596	0.0652415
ebi-fl187-GCST90094838	Shellfish liking	GCST90043910	rs6041404	20	12482680	T	C	0.072531	0.011924	T	C	0.0536791	0.0721362
ebi-fl187-GCST90094838	Shellfish liking	GCST90043910	rs62273284	3	118361683	T	C	-0.071785	0.011225	T	C	0.0119623	0.0696008
ebi-fl187-GCST90094838	Shellfish liking	GCST90043910	rs624565	18	40947391	T	C	-0.078349	0.011162	T	C	0.0233959	0.0675612
ebi-fl187-GCST90094838	Shellfish liking	GCST90043910	rs6845984	4	32785223	T	C	-0.072451	0.012352	T	C	-0.021471	0.0751022
ebi-fl187-GCST90094838	Shellfish liking	GCST90043910	rs6957780	7	68030709	A	G	0.062928	0.010695	A	G	0.0474764	0.0651551
ebi-fl187-GCST90094838	Shellfish liking	GCST90043910	rs7148387	14	29775132	G	A	-0.064244	0.010775	G	A	-0.0850277	0.065258
ebi-fl187-GCST90094838	Shellfish liking	GCST90043910	rs715280	2	77301099	A	G	0.081073	0.012053	A	G	0.0127105	0.0730139
ebi-fl187-GCST90094838	Shellfish liking	GCST90043910	rs73728611	6	32589363	G	A	-0.165863	0.01667	G	A	-0.156204	0.104468
ebi-fl187-GCST90094838	Shellfish liking	GCST90043910	rs76084961	3	85604041	G	T	-0.099136	0.010981	G	T	0.0560668	0.0668432
ebi-fl187-GCST90094838	Shellfish liking	GCST90043910	rs7838901	8	10207274	G	A	-0.070763	0.012794	G	A	0.0198291	0.0783538
Food liking
ebi-fl187-GCST90094739	Coffee max liking	ukb-saige-204.4	rs12149832	16	53842908	A	G	0.054224	0.008241	A	G	0.078	0.061
ebi-fl187-GCST90094739	Coffee max liking	ukb-saige-204.4	rs1418462	1	96289021	T	A	0.049161	0.008635	T	A	0.07	0.064
ebi-fl187-GCST90094739	Coffee max liking	ukb-saige-204.4	rs2039722	6	98314912	G	A	0.046467	0.008135	G	A	-0.036	0.06
ebi-fl187-GCST90094739	Coffee max liking	ukb-saige-204.4	rs2472297	15	75027880	T	C	0.105058	0.009179	T	C	0.099	0.068
ebi-fl187-GCST90094739	Coffee max liking	ukb-saige-204.4	rs6968865	7	17287269	T	A	0.079938	0.008305	T	A	0.08	0.062
ebi-fl187-GCST90094864	Vinegar liking	ukb-saige-204.4	rs10109510	8	64882069	C	T	0.045094	0.00785	C	T	0.064	0.064
ebi-fl187-GCST90094864	Vinegar liking	ukb-saige-204.4	rs1024207	20	21591481	G	A	-0.064357	0.008879	G	A	0.15	0.072
ebi-fl187-GCST90094864	Vinegar liking	ukb-saige-204.4	rs11642841	16	53845487	A	C	-0.044118	0.0076	A	C	0.076	0.061
ebi-fl187-GCST90094864	Vinegar liking	ukb-saige-204.4	rs1553776	8	22742341	A	C	0.070721	0.010851	A	C	-0.2	0.088
ebi-fl187-GCST90094864	Vinegar liking	ukb-saige-204.4	rs2571014	18	44640330	G	A	0.046812	0.007758	G	A	-0.04	0.063
ebi-fl187-GCST90094864	Vinegar liking	ukb-saige-204.4	rs3131062	6	30763714	A	T	-0.060168	0.009616	A	T	0.04	0.078
ebi-fl187-GCST90094864	Vinegar liking	ukb-saige-204.4	rs35303761	7	69810892	G	A	-0.048292	0.008684	G	A	0.12	0.07
ebi-fl187-GCST90094864	Vinegar liking	ukb-saige-204.4	rs4758259	11	7961130	T	C	-0.042853	0.007683	T	C	-0.1	0.062
ebi-fl187-GCST90094864	Vinegar liking	ukb-saige-204.4	rs504675	2	45154689	T	C	0.057532	0.007798	T	C	-0.067	0.063
ebi-fl187-GCST90094864	Vinegar liking	ukb-saige-204.4	rs7627615	3	183818416	A	G	-0.065328	0.007549	A	G	0.092	0.061

## Sheet: Table S3
Table S3. Significant associations between diet and multiple myeloma(MM) identified in primary MR analyses using the inverse-variance weighted (IVW) method
id	Exposure	Outcome	Number of IVs	R2	F-statistics	IVW			Weighted median		MR Egger		Weighted mode		MR-PRESSO		MR-PRESSO global test P	Heterogeneity(IVW)		Pleiotropy(Egger)		Reverse MR (IVW)			Power
						OR (95% CI)	P	P_fdr	OR (95% CI)	P	OR (95% CI)	P	OR (95% CI)	P	OR (95% CI)	P		Q	P	Intercept	P	Number of IVs	OR (95% CI)	P
Food intake
ebi-fi38-GCST90096894	Coffee consumption	GCST90043910	11	0.0115392	1226.17	2.72(1.21-6.10)	0.0150513	0.0218354	3.45(1.28-9.27)	0.0142259	3.67(0.76-17.83)	0.140931	3.39(1.26-9.11)	0.0357077	2.72(1.42-5.21)	0.0128003	0.815333	6.4619	0.77508	-0.0187865	0.675552	8	0.99(0.98-1.00)	0.21673	0.98
ebi-fi38-GCST90096908	Decaffeinated coffee consumption	GCST90043910	3	0.0026575	165.39	7.10(1.33-37.87)	0.0218354	0.0218354	10.33(1.52-70.27)	0.0169449	283.59(0.03-2335516.46)	0.435156	11.43(0.99-131.49)	0.189772	/	/	/	1.26641	0.530889	-0.173702	0.564305	8	1.00(1.00-1.00)	0.504824	1
ebi-fi38-GCST90096913	Ground coffee consumption	GCST90043910	3	0.00545979	396.767	4.04(1.25-13.02)	0.0193487	0.0218354	4.89(1.35-17.68)	0.0155731	27.97(0.71-1104.88)	0.326478	4.89(1.34-17.83)	0.138136	/	/	/	1.20849	0.546486	-0.137886	0.473172	7	1.00(0.99-1.00)	0.0714753	1
ebi-fi38-GCST90096914	Instant coffee consumption	GCST90043910	9	0.00563377	1024.14	6.13(1.95-19.34)	0.00195826	0.00783304	6.01(1.45-24.95)	0.0135131	4.32(0.46-40.21)	0.239344	5.75(1.48-22.40)	0.0355983	6.13(3.31-11.38)	0.000427407	0.979	2.31742	0.969702	0.0170845	0.730008	8	1.00(1.00-1.00)	0.50139	1
Food liking
ebi-fl187-GCST90094695	Bacon liking	GCST90043910	4	0.00536086	854.539	0.26(0.08-0.87)	0.0288736	0.0444049	0.23(0.06-0.94)	0.0409087	0.16(0.00-10.54)	0.483109	0.22(0.04-1.18)	0.17571	0.26(0.19-0.36)	0.00355872	0.982	0.203795	0.976974	0.0287538	0.838544	17	1.00(0.98-1.01)	0.442367	0.22
ebi-fl187-GCST90094727	Cauliflower liking	GCST90043910	4	0.00277501	443.828	0.15(0.03-0.83)	0.0296033	0.0444049	0.17(0.02-1.31)	0.0892831	0.09(0.00-94.82)	0.570612	0.21(0.01-3.08)	0.336567	0.15(0.08-0.29)	0.0106496	0.929333	0.43525	0.932868	0.0245836	0.897713	16	1.00(0.99-1.01)	0.714934	0.17
ebi-fl187-GCST90094739	Coffee max liking	GCST90043910	5	0.0103495	1662.82	2.94(1.23-7.03)	0.0154382	0.034736	3.22(1.16-8.95)	0.0251083	3.39(0.58-19.97)	0.27025	3.23(0.93-11.20)	0.138063	2.94(1.75-4.93)	0.0151744	0.887333	1.41373	0.841806	-0.0123261	0.867714	17	1.01(1.00-1.02)	0.185171	0.99
ebi-fl187-GCST90094760	F-fatty/dairy food liking (derived food-liking factor)	GCST90043910	5	0.0207511	3376.4	0.39(0.19-0.81)	0.0117849	0.034736	0.40(0.17-0.90)	0.0275578	0.18(0.02-1.96)	0.254922	0.34(0.13-0.88)	0.0905176	0.39(0.19-0.81)	0.0654599	0.329	5.39855	0.248792	0.0801758	0.551024	15	1.01(0.99-1.03)	0.368752	0.49
ebi-fl187-GCST90094765	Fried fish liking	GCST90043910	5	0.00683012	1092.45	4.06(1.37-12.03)	0.0114681	0.034736	2.47(0.60-10.23)	0.213175	490.51(0.40-601311.37)	0.186257	2.17(0.33-14.12)	0.462933	4.06(1.80-9.17)	0.0280214	0.709667	2.24993	0.6899	-0.307251	0.273559	17	1.00(0.99-1.01)	0.968301	1
ebi-fl187-GCST90094799	F-meat liking	GCST90043910	11	0.0319497	5231.38	0.43(0.26-0.71)	0.0010256	0.00923045	0.45(0.23-0.87)	0.0176226	0.72(0.14-3.71)	0.702306	0.45(0.18-1.13)	0.121481	0.43(0.31-0.60)	0.00050789	0.943333	4.24698	0.935518	-0.0493077	0.536387	15	0.99(0.96-1.02)	0.366906	0.61
ebi-fl187-GCST90094815	Porridge liking	GCST90043910	10	0.0158021	2554.81	2.05(1.01-4.17)	0.0468089	0.0468089	1.92(0.77-4.77)	0.160973	1.33(0.10-16.88)	0.833686	1.93(0.61-6.15)	0.294025	2.05(1.41-2.99)	0.00456132	0.985667	2.53071	0.980046	0.0275882	0.734572	17	1.00(0.99-1.01)	0.80991	0.83
ebi-fl187-GCST90094838	Shellfish liking	GCST90043910	30	0.0756281	12721.4	1.43(1.01-2.02)	0.0414683	0.0466518	1.78(1.14-2.80)	0.0116993	2.49(0.54-11.50)	0.251137	2.10(0.84-5.25)	0.125524	1.43(1.01-2.02)	0.0506761	0.353	31.6065	0.337407	-0.0446309	0.469909	17	0.99(0.98-1.01)	0.355225	0.74
Food intake
ebi-fi38-GCST90096894	Coffee consumption	ukb-saige-204.4	9	0.0108943	1156.88	2.46(1.03-5.88)	0.0436385	0.0436385	2.32(0.90-5.98)	0.0808456	1.02(0.19-5.61)	0.978259	2.17(0.82-5.74)	0.135551	2.46(1.03-5.88)	0.0783561	0.404	10.0474	0.261717	0.0582439	0.281838	13	1.00(0.99-1.01)	0.848569	0.95
ebi-fi38-GCST90096914	Instant coffee consumption	ukb-saige-204.4	9	0.00563377	1024.14	4.90(1.67-14.38)	0.00384445	0.0076889	3.26(0.88-12.05)	0.0757898	1.38(0.17-11.16)	0.770425	3.38(0.97-11.81)	0.0923756	4.90(2.14-11.21)	0.00554676	0.828	4.72908	0.786101	0.0614825	0.208429	13	1.00(1.00-1.00)	0.886353	1
Food liking
ebi-fl187-GCST90094739	Coffee max liking	ukb-saige-204.4	5	0.0108426	1742.92	2.46(1.11-5.46)	0.0271474	0.0271474	2.66(1.01-6.97)	0.0469861	4.00(0.31-51.06)	0.363965	2.85(0.94-8.70)	0.138752	2.46(1.38-4.38)	0.037906	0.805333	2.09444	0.718393	-0.0353845	0.71933	22	1.01(0.99-1.02)	0.407118	0.95
ebi-fl187-GCST90094864	Vinegar liking	ukb-saige-204.4	10	0.0119029	1922.14	0.32(0.13-0.82)	0.0172013	0.0271474	0.26(0.10-0.74)	0.0107838	0.00(0.00-0.19)	0.0273655	0.24(0.06-0.96)	0.073536	0.32(0.13-0.82)	0.0410674	0.188333	13.2892	0.149951	0.275079	0.0562511	22	1.00(0.99-1.02)	0.863796	0.41
Abbreviations: IVs instrumental variables, OR odds ratio per standard deviation (SD) in genetically predicted plasma level, CI confidence interval, P_fdr adjusted p-values in the Benjamini-Hochberg procedure, MR-PRESSO Mendelian Randomization Pleiotropy RESidual Sum and Outlier. The statistical power of MR estimates was calculated via an online website (https://shiny.cnsgenomics.com/mRnd/).

## Sheet: Table S4
Table S4. Summary statistics of instrumental variables (IVs) used for reverse Mendelian randomization (MR) analyses for the significant associations between coffee consumption and multiple myeloma(MM) identified in primary analyses
id	Exposure	Outcome	IV	Chr	Position (HG 19)	Cancer as exposure				Food intake as outcome
						Effect allele	Other allele	Beta	SE	Effect allele	Other allele	Beta	SE
ebi-fi38-GCST90096894	GCST90043910	Coffee consumption	rs10125045	9	7296314	A	G	0.417795	0.0915619	A	G	-0.00884378	0.00669137
ebi-fi38-GCST90096894	GCST90043910	Coffee consumption	rs10906890	10	15385401	C	T	-0.31956	0.0646979	C	T	-0.00215382	0.00488553
ebi-fi38-GCST90096894	GCST90043910	Coffee consumption	rs1948915	8	128222421	C	T	0.314618	0.0697841	C	T	0.00094757	0.0052779
ebi-fi38-GCST90096894	GCST90043910	Coffee consumption	rs62484471	7	106261335	C	A	-0.352743	0.0785696	C	A	-0.0063431	0.00585815
ebi-fi38-GCST90096894	GCST90043910	Coffee consumption	rs6598451	15	101882380	A	G	0.362777	0.0694728	A	G	-0.00996878	0.0051972
ebi-fi38-GCST90096894	GCST90043910	Coffee consumption	rs6672970	1	19118367	A	G	0.470629	0.106382	A	G	-0.00904722	0.0078221
ebi-fi38-GCST90096894	GCST90043910	Coffee consumption	rs75341503	7	21936698	C	A	-0.337855	0.0679661	C	A	0.00127897	0.00512484
ebi-fi38-GCST90096894	GCST90043910	Coffee consumption	rs80042276	6	96384930	T	C	0.491655	0.111044	T	C	-0.00307927	0.00819487
ebi-fi38-GCST90096908	GCST90043910	Decaffeinated coffee consumption	rs10125045	9	7296314	A	G	0.417795	0.0915619	A	G	-0.00118211	0.00205171
ebi-fi38-GCST90096908	GCST90043910	Decaffeinated coffee consumption	rs10906890	10	15385401	C	T	-0.31956	0.0646979	C	T	-0.000941724	0.00149693
ebi-fi38-GCST90096908	GCST90043910	Decaffeinated coffee consumption	rs1948915	8	128222421	C	T	0.314618	0.0697841	C	T	-0.000511713	0.00161528
ebi-fi38-GCST90096908	GCST90043910	Decaffeinated coffee consumption	rs62484471	7	106261335	C	A	-0.352743	0.0785696	C	A	0.00101979	0.00180298
ebi-fi38-GCST90096908	GCST90043910	Decaffeinated coffee consumption	rs6598451	15	101882380	A	G	0.362777	0.0694728	A	G	-0.00113475	0.00159252
ebi-fi38-GCST90096908	GCST90043910	Decaffeinated coffee consumption	rs6672970	1	19118367	A	G	0.470629	0.106382	A	G	-0.00176698	0.00239462
ebi-fi38-GCST90096908	GCST90043910	Decaffeinated coffee consumption	rs75341503	7	21936698	C	A	-0.337855	0.0679661	C	A	-0.000406109	0.00157336
ebi-fi38-GCST90096908	GCST90043910	Decaffeinated coffee consumption	rs80042276	6	96384930	T	C	0.491655	0.111044	T	C	0.000259508	0.0025348
ebi-fi38-GCST90096913	GCST90043910	Ground coffee consumption	rs10125045	9	7296314	A	G	0.417795	0.0915619	A	G	-0.00121721	0.00173563
ebi-fi38-GCST90096913	GCST90043910	Ground coffee consumption	rs10906890	10	15385401	C	T	-0.31956	0.0646979	C	T	0.000172178	0.00126581
ebi-fi38-GCST90096913	GCST90043910	Ground coffee consumption	rs1948915	8	128222421	C	T	0.314618	0.0697841	C	T	0.000322639	0.00137113
ebi-fi38-GCST90096913	GCST90043910	Ground coffee consumption	rs6598451	15	101882380	A	G	0.362777	0.0694728	A	G	-0.00229428	0.00134718
ebi-fi38-GCST90096913	GCST90043910	Ground coffee consumption	rs6672970	1	19118367	A	G	0.470629	0.106382	A	G	-0.00164149	0.00202858
ebi-fi38-GCST90096913	GCST90043910	Ground coffee consumption	rs75341503	7	21936698	C	A	-0.337855	0.0679661	C	A	0.00147978	0.0013279
ebi-fi38-GCST90096913	GCST90043910	Ground coffee consumption	rs80042276	6	96384930	T	C	0.491655	0.111044	T	C	-0.00080224	0.00210344
ebi-fi38-GCST90096914	GCST90043910	Instant coffee consumption	rs10125045	9	7296314	A	G	0.417795	0.0915619	A	G	-0.0017648	0.00120292
ebi-fi38-GCST90096914	GCST90043910	Instant coffee consumption	rs10906890	10	15385401	C	T	-0.31956	0.0646979	C	T	-0.000329507	0.000881982
ebi-fi38-GCST90096914	GCST90043910	Instant coffee consumption	rs1948915	8	128222421	C	T	0.314618	0.0697841	C	T	0.000587616	0.000949533
ebi-fi38-GCST90096914	GCST90043910	Instant coffee consumption	rs62484471	7	106261335	C	A	-0.352743	0.0785696	C	A	-0.000276619	0.00105174
ebi-fi38-GCST90096914	GCST90043910	Instant coffee consumption	rs6598451	15	101882380	A	G	0.362777	0.0694728	A	G	-0.0011353	0.000937143
ebi-fi38-GCST90096914	GCST90043910	Instant coffee consumption	rs6672970	1	19118367	A	G	0.470629	0.106382	A	G	-0.000817999	0.00141188
ebi-fi38-GCST90096914	GCST90043910	Instant coffee consumption	rs75341503	7	21936698	C	A	-0.337855	0.0679661	C	A	-0.000664815	0.000920841
ebi-fi38-GCST90096914	GCST90043910	Instant coffee consumption	rs80042276	6	96384930	T	C	0.491655	0.111044	T	C	-0.000833627	0.00147829
ebi-fi38-GCST90096894	ukb-saige-204.4	Coffee consumption	rs1004308	9	124977274	T	C	0.37	0.077	T	C	0.00500965	0.0061698
ebi-fi38-GCST90096894	ukb-saige-204.4	Coffee consumption	rs10829545	10	130807146	T	G	0.29	0.063	T	G	-0.00259908	0.0051071
ebi-fi38-GCST90096894	ukb-saige-204.4	Coffee consumption	rs10906890	10	15385401	C	T	-0.27	0.061	C	T	-0.00215382	0.00488553
ebi-fi38-GCST90096894	ukb-saige-204.4	Coffee consumption	rs12439628	15	87735974	C	T	0.42	0.093	C	T	0.00468595	0.00740312
ebi-fi38-GCST90096894	ukb-saige-204.4	Coffee consumption	rs17128182	10	91610601	C	T	0.48	0.1	C	T	-0.00065204	0.00827216
ebi-fi38-GCST90096894	ukb-saige-204.4	Coffee consumption	rs4417750	2	190381931	T	C	-0.42	0.093	T	C	0.0108328	0.00736072
ebi-fi38-GCST90096894	ukb-saige-204.4	Coffee consumption	rs61406459	11	91680508	G	A	0.83	0.18	G	A	0.00258367	0.0133774
ebi-fi38-GCST90096894	ukb-saige-204.4	Coffee consumption	rs62484471	7	106261335	C	A	-0.33	0.073	C	A	-0.0063431	0.00585815
ebi-fi38-GCST90096894	ukb-saige-204.4	Coffee consumption	rs644835	1	100543962	G	A	0.45	0.1	G	A	0.00303481	0.00795037
ebi-fi38-GCST90096894	ukb-saige-204.4	Coffee consumption	rs7245313	18	56517508	C	T	-0.29	0.061	C	T	0.00356976	0.00491577
ebi-fi38-GCST90096894	ukb-saige-204.4	Coffee consumption	rs73061888	3	55190901	A	G	0.84	0.19	A	G	0.00348968	0.0143266
ebi-fi38-GCST90096894	ukb-saige-204.4	Coffee consumption	rs75341503	7	21936698	C	A	-0.35	0.064	C	A	0.00127897	0.00512484
ebi-fi38-GCST90096894	ukb-saige-204.4	Coffee consumption	rs78073134	17	75684348	A	G	1.2	0.26	A	G	6.41689e-05	0.0191259
ebi-fi38-GCST90096914	ukb-saige-204.4	Instant coffee consumption	rs1004308	9	124977274	T	C	0.37	0.077	T	C	0.000768041	0.00111497
ebi-fi38-GCST90096914	ukb-saige-204.4	Instant coffee consumption	rs10829545	10	130807146	T	G	0.29	0.063	T	G	0.0010449	0.000920085
ebi-fi38-GCST90096914	ukb-saige-204.4	Instant coffee consumption	rs10906890	10	15385401	C	T	-0.27	0.061	C	T	-0.000329507	0.000881982
ebi-fi38-GCST90096914	ukb-saige-204.4	Instant coffee consumption	rs12439628	15	87735974	C	T	0.42	0.093	C	T	0.0015918	0.00133993
ebi-fi38-GCST90096914	ukb-saige-204.4	Instant coffee consumption	rs17128182	10	91610601	C	T	0.48	0.1	C	T	-0.00163884	0.00150044
ebi-fi38-GCST90096914	ukb-saige-204.4	Instant coffee consumption	rs4417750	2	190381931	T	C	-0.42	0.093	T	C	0.00137336	0.00133424
ebi-fi38-GCST90096914	ukb-saige-204.4	Instant coffee consumption	rs61406459	11	91680508	G	A	0.83	0.18	G	A	-0.000256521	0.00241905
ebi-fi38-GCST90096914	ukb-saige-204.4	Instant coffee consumption	rs62484471	7	106261335	C	A	-0.33	0.073	C	A	-0.000276619	0.00105174
ebi-fi38-GCST90096914	ukb-saige-204.4	Instant coffee consumption	rs644835	1	100543962	G	A	0.45	0.1	G	A	0.000227861	0.00143188
ebi-fi38-GCST90096914	ukb-saige-204.4	Instant coffee consumption	rs7245313	18	56517508	C	T	-0.29	0.061	C	T	0.000981314	0.000884803
ebi-fi38-GCST90096914	ukb-saige-204.4	Instant coffee consumption	rs73061888	3	55190901	A	G	0.84	0.19	A	G	-0.00331424	0.00259403
ebi-fi38-GCST90096914	ukb-saige-204.4	Instant coffee consumption	rs75341503	7	21936698	C	A	-0.35	0.064	C	A	-0.000664815	0.000920841
ebi-fi38-GCST90096914	ukb-saige-204.4	Instant coffee consumption	rs78073134	17	75684348	A	G	1.2	0.26	A	G	0.00169522	0.00340095

## Sheet: Table S5
Table S5. Significant associations between metabolomics and multiple myeloma(MM) identified in primary MR analyses using the inverse-variance weighted (IVW) method
id	Exposure	Outcome	Number of IVs	R2	F-statistics	IVW			Weighted median		MR Egger		Weighted mode		MR-PRESSO		MR-PRESSO global test P	Heterogeneity(IVW)		Pleiotropy(Egger)		Reverse MR (IVW)			Power
						OR (95% CI)	P	P_fdr	OR (95% CI)	P	OR (95% CI)	P	OR (95% CI)	P	OR (95% CI)	P		Q	P	Intercept	P	Number of IVs	OR (95% CI)	P
Blood metabolites
ebi-met1400-GCST90199624	Hippurate levels	GCST90043910	19	0.0479946	416.32	1.55(1.02-2.33)	0.0380195	0.0496393	1.64(0.95-2.85)	0.0780943	1.50(0.56-4.03)	0.430081	1.73(0.65-4.64)	0.288273	1.55(1.09-2.18)	0.0236332	0.826	12.6764	0.810428	0.00337278	0.950868	9	1.00(0.97-1.03)	0.948284	0.75
ebi-met1400-GCST90199643	Glycodeoxycholate levels	GCST90043910	19	0.0585186	427.322	1.47(1.02-2.12)	0.0403292	0.0496393	1.43(0.84-2.43)	0.190464	1.25(0.53-2.96)	0.611378	1.79(0.67-4.73)	0.257698	1.47(1.03-2.10)	0.0483161	0.552	16.8626	0.532567	0.0205824	0.692968	8	1.01(0.97-1.05)	0.527135	0.71
ebi-met1400-GCST90199855	5alpha-androstan-3beta,17beta-diol monosulfate (2) levels	GCST90043910	30	0.130355	1058.86	0.76(0.61-0.94)	0.0115818	0.0489008	0.89(0.66-1.19)	0.433924	0.87(0.65-1.16)	0.351826	0.91(0.68-1.22)	0.524322	0.76(0.64-0.90)	0.00313749	0.877667	17.806	0.948131	-0.0362832	0.195904	12	1.00(0.98-1.03)	0.801118	0.49
ebi-met1400-GCST90199869	3-hydroxyhippurate levels	GCST90043910	18	0.0473508	409.514	0.62(0.41-0.94)	0.0239216	0.0496393	0.62(0.36-1.06)	0.0777704	0.54(0.22-1.31)	0.189359	0.74(0.29-1.90)	0.545151	0.62(0.45-0.86)	0.0097198	0.888333	10.2275	0.893798	0.0186974	0.716918	8	1.01(0.98-1.04)	0.608704	0.44
ebi-met1400-GCST90199888	Cinnamoylglycine levels	GCST90043910	30	0.0794139	674.761	1.65(1.19-2.27)	0.00248702	0.0440449	1.83(1.19-2.80)	0.0055244	1.24(0.62-2.46)	0.553205	1.88(0.83-4.29)	0.142947	1.65(1.25-2.17)	0.00143193	0.86	21.3699	0.84532	0.0398887	0.362962	9	1.00(0.97-1.03)	0.953502	0.98
ebi-met1400-GCST90199919	Alliin levels	GCST90043910	19	0.115264	848.781	1.34(1.03-1.75)	0.0266093	0.0496393	1.22(0.87-1.69)	0.248621	1.32(0.83-2.09)	0.255636	1.22(0.87-1.72)	0.26244	1.34(1.03-1.75)	0.0397214	0.457667	18.7888	0.404935	0.00421585	0.921716	7	1.00(0.97-1.04)	0.810596	0.73
ebi-met1400-GCST90199943	2-piperidinone levels	GCST90043910	22	0.0563447	490.987	1.48(1.02-2.15)	0.0404952	0.0496393	1.50(0.87-2.58)	0.143927	1.86(0.86-4.04)	0.133297	1.43(0.59-3.45)	0.433327	1.48(1.10-1.99)	0.016073	0.916667	12.8605	0.913433	-0.0364422	0.519469	9	1.00(0.97-1.03)	0.97237	0.71
ebi-met1400-GCST90199961	Methionine sulfone levels	GCST90043910	35	0.171311	1705.9	1.33(1.07-1.65)	0.00943222	0.0489008	1.24(0.90-1.72)	0.194886	1.15(0.78-1.70)	0.486987	1.23(0.89-1.70)	0.221942	1.33(1.07-1.65)	0.0137159	0.498333	33.9108	0.472036	0.0256571	0.381414	10	0.99(0.97-1.02)	0.612143	0.86
ebi-met1400-GCST90200000	Umbelliferone sulfate levels	GCST90043910	23	0.0896778	551.274	0.69(0.51-0.94)	0.0171559	0.0496393	0.70(0.46-1.07)	0.096158	0.78(0.43-1.43)	0.434796	0.48(0.23-0.99)	0.0597981	0.69(0.57-0.85)	0.0015276	0.991333	9.55218	0.989931	-0.0222109	0.658591	7	1.00(0.96-1.05)	0.836673	0.53
ebi-met1400-GCST90200049	Myristoyl dihydrosphingomyelin (d18:0/14:0) levels	GCST90043910	30	0.0827467	744.424	0.68(0.50-0.92)	0.0136785	0.0496393	0.72(0.46-1.15)	0.173829	0.57(0.28-1.15)	0.129661	0.73(0.42-1.27)	0.277878	0.68(0.53-0.87)	0.00413325	0.957667	18.1847	0.940421	0.0212735	0.598754	7	1.00(0.97-1.03)	0.954191	0.54
ebi-met1400-GCST90200064	N-palmitoyl-sphinganine (d18:0/16:0) levels	GCST90043910	22	0.0600802	524.532	0.64(0.44-0.92)	0.0156953	0.0496393	0.55(0.33-0.91)	0.0211294	0.57(0.23-1.42)	0.241728	0.56(0.24-1.27)	0.177586	0.64(0.45-0.90)	0.0195309	0.582667	19.1702	0.574225	0.0140528	0.799734	8	0.99(0.96-1.02)	0.45867	0.5
ebi-met1400-GCST90200168	Hydroxyasparagine levels	GCST90043910	20	0.0400553	342.326	1.74(1.09-2.77)	0.0198974	0.0496393	1.59(0.84-3.02)	0.151763	3.55(1.18-10.71)	0.0374101	1.37(0.36-5.20)	0.64931	1.74(1.09-2.77)	0.0310934	0.349667	21.0694	0.332979	-0.0768011	0.181681	8	1.00(0.97-1.02)	0.732237	0.9
ebi-met1400-GCST90200193	Ethyl beta-glucopyranoside levels	GCST90043910	18	0.112002	1027.95	1.49(1.14-1.95)	0.00347723	0.0440449	1.63(1.18-2.25)	0.00317691	1.50(1.02-2.20)	0.0556266	1.65(1.18-2.30)	0.00913209	1.49(1.17-1.89)	0.00436813	0.746333	13.4501	0.705574	-0.0012192	0.971008	9	1.00(0.97-1.03)	0.879766	0.95
ebi-met1400-GCST90200194	N-lactoyl phenylalanine levels	GCST90043910	16	0.0376658	321.77	1.61(1.01-2.56)	0.043193	0.049756	1.83(0.95-3.53)	0.0693833	2.80(0.79-9.94)	0.133832	2.71(0.78-9.41)	0.137073	1.61(1.06-2.45)	0.0414253	0.649667	12.3271	0.654118	-0.0559853	0.374315	8	1.00(0.97-1.03)	0.908284	0.74
ebi-met1400-GCST90200226	5-hydroxy-2-methylpyridine sulfate levels	GCST90043910	19	0.0592577	439.358	1.47(1.02-2.13)	0.0394671	0.0496393	1.39(0.87-2.23)	0.173022	1.21(0.53-2.75)	0.653705	1.29(0.56-2.95)	0.554593	1.47(1.13-1.92)	0.0106264	0.949	9.39601	0.949851	0.0275394	0.606755	9	1.00(0.96-1.03)	0.792502	0.72
ebi-met1400-GCST90200240	Hydroxy-N6,N6,N6-trimethyllysine levels	GCST90043910	27	0.0640132	559.987	0.68(0.48-0.97)	0.034483	0.0496393	0.63(0.38-1.04)	0.070809	0.50(0.23-1.09)	0.0942326	0.59(0.21-1.68)	0.334846	0.68(0.49-0.96)	0.0361619	0.597667	23.8124	0.58669	0.0387297	0.38386	12	1.01(0.98-1.03)	0.599884	0.43
ebi-met1400-GCST90200348	Quinolinate levels	GCST90043910	19	0.0516796	446.921	1.61(1.08-2.39)	0.018257	0.0496393	1.52(0.88-2.63)	0.134828	1.27(0.48-3.34)	0.638358	1.55(0.71-3.38)	0.289443	1.61(1.20-2.17)	0.00573472	0.934	10.2095	0.924854	0.0282023	0.602531	8	1.00(0.97-1.03)	0.870941	0.87
ebi-met1400-GCST90200376	Flavin adenine dinucleotide (FAD) levels	GCST90043910	22	0.144231	1054.22	0.73(0.58-0.92)	0.00817899	0.0489008	0.69(0.50-0.95)	0.021008	0.63(0.42-0.95)	0.0374066	0.68(0.48-0.96)	0.0388675	0.73(0.61-0.87)	0.00236047	0.948667	12.2906	0.931439	0.0337302	0.399994	9	1.00(0.97-1.04)	0.944701	0.62
ebi-met1400-GCST90200382	Cystine levels	GCST90043910	18	0.0452916	387.824	0.66(0.43-1.00)	0.0491554	0.049756	0.54(0.30-0.97)	0.0379176	0.43(0.17-1.12)	0.104475	0.46(0.17-1.25)	0.144371	0.66(0.46-0.94)	0.0331779	0.784667	12.2454	0.785058	0.0581417	0.358055	5	0.99(0.94-1.03)	0.562935	0.37
ebi-met1400-GCST90200403	Citrulline levels	GCST90043910	28	0.0772106	682.336	0.63(0.43-0.95)	0.0254755	0.0496393	0.70(0.43-1.13)	0.145735	0.45(0.18-1.12)	0.0969152	0.74(0.32-1.70)	0.481659	0.63(0.43-0.95)	0.0339526	0.064	40.3469	0.0475313	0.044415	0.413197	11	0.99(0.97-1.02)	0.711075	0.61
ebi-met1400-GCST90200497	X-12740 levels	GCST90043910	13	0.0454812	307.188	0.60(0.39-0.93)	0.0217092	0.0496393	0.61(0.34-1.11)	0.105697	0.76(0.26-2.22)	0.622663	0.86(0.32-2.32)	0.768174	0.60(0.43-0.85)	0.0141061	0.821667	7.67944	0.809653	-0.0298252	0.66027	7	1.00(0.96-1.03)	0.855129	0.46
ebi-met1400-GCST90200540	X-15461 levels	GCST90043910	23	0.057786	499.349	0.65(0.45-0.95)	0.0245722	0.0496393	0.57(0.34-0.95)	0.0310309	0.56(0.23-1.37)	0.21835	0.51(0.19-1.34)	0.184845	0.65(0.46-0.91)	0.0203421	0.732	17.7813	0.718873	0.0155688	0.733112	10	1.00(0.97-1.03)	0.987163	0.46
ebi-met1400-GCST90200608	X-22162 levels	GCST90043910	26	0.166657	1649.28	1.30(1.03-1.65)	0.0278596	0.0496393	1.33(0.97-1.83)	0.0753468	1.28(0.92-1.78)	0.149664	1.27(0.95-1.68)	0.118711	1.30(1.03-1.65)	0.037328	0.37	27.8141	0.316482	0.0048645	0.887976	9	1.00(0.97-1.03)	0.838757	0.78
ebi-met1400-GCST90200648	X-24585 levels	GCST90043910	19	0.0494882	428.962	0.64(0.42-0.96)	0.0322374	0.0496393	0.59(0.33-1.05)	0.0715554	0.46(0.19-1.13)	0.107866	0.55(0.19-1.58)	0.281913	0.64(0.42-0.96)	0.0461695	0.443667	18.1912	0.443124	0.0427302	0.433608	10	1.00(0.97-1.03)	0.911195	0.43
ebi-met1400-GCST90200698	N2-acetyl,N6-methyllysine levels	GCST90043910	29	0.248275	2664.32	0.89(0.79-1.00)	0.0452722	0.049756	0.90(0.79-1.03)	0.137209	0.88(0.75-1.04)	0.140114	0.91(0.80-1.03)	0.145518	0.89(0.79-0.99)	0.0494074	0.633	26.6004	0.540078	0.00259026	0.925552	7	1.01(0.97-1.04)	0.771174	0.24
ebi-met1400-GCST90200781	Glucose to maltose ratio	GCST90043910	17	0.0569754	380.994	1.67(1.15-2.45)	0.00759328	0.0489008	1.77(1.06-2.95)	0.0283983	1.14(0.37-3.56)	0.820329	1.76(0.74-4.20)	0.218499	1.67(1.33-2.11)	0.000434178	0.99	5.85201	0.989617	0.047497	0.495378	4	1.00(0.95-1.06)	0.963122	0.94
ebi-met1400-GCST90200796	Spermidine to (N(1) + N(8))-acetylspermidine ratio	GCST90043910	24	0.0815802	647.102	1.38(1.00-1.90)	0.0485524	0.049756	1.28(0.81-2.02)	0.296671	1.66(0.82-3.35)	0.175304	1.06(0.49-2.28)	0.884888	1.38(1.01-1.88)	0.0539611	0.527	21.6926	0.538871	-0.0235087	0.576368	5	1.00(0.95-1.05)	0.926296	0.67
ebi-met1400-GCST90200806	Spermidine to ergothioneine ratio	GCST90043910	20	0.0691252	541.269	1.09(1.00-1.19)	0.0475507	0.049756	1.07(0.97-1.19)	0.165289	1.06(0.96-1.17)	0.267143	1.07(0.98-1.18)	0.144124	1.09(1.02-1.17)	0.0247256	0.535333	12.5417	0.861184	0.0267306	0.24388	7	0.99(0.96-1.03)	0.758735	0.08
ebi-met1400-GCST90200833	Cholate to adenosine 5'-monophosphate (AMP) ratio	GCST90043910	21	0.0566553	466.469	1.51(1.04-2.21)	0.0316329	0.0496393	1.96(1.16-3.33)	0.012478	1.90(0.84-4.30)	0.138194	2.50(0.89-7.02)	0.0968362	1.51(1.04-2.21)	0.0440567	0.403667	20.9191	0.401909	-0.0343361	0.539238	6	0.99(0.96-1.03)	0.752982	0.77
ebi-met1400-GCST90200835	Adenosine 5'-diphosphate (ADP) to glycerol ratio	GCST90043910	22	0.099761	506.762	1.55(1.11-2.16)	0.010425	0.0489008	1.38(0.89-2.14)	0.150972	1.34(0.59-3.05)	0.487804	1.18(0.48-2.94)	0.722027	1.55(1.11-2.16)	0.0181864	0.128667	29.1819	0.109702	0.0238529	0.713955	6	1.01(0.96-1.06)	0.822773	0.97
ebi-met1400-GCST90200879	Adenosine 5'-monophosphate (AMP) to glutamate ratio	GCST90043910	22	0.0518405	448.935	1.70(1.03-2.81)	0.0368647	0.0496393	1.39(0.77-2.52)	0.271129	1.90(0.43-8.28)	0.404236	1.31(0.47-3.65)	0.608423	1.70(1.03-2.81)	0.0492369	0.047	33.3279	0.0427052	-0.01119	0.880293	11	1.00(0.97-1.02)	0.805748	0.94
ebi-met1400-GCST90200896	Inosine to EDTA ratio	GCST90043910	23	0.10141	555.699	0.75(0.57-1.00)	0.049756	0.049756	0.67(0.45-1.01)	0.056341	0.83(0.42-1.66)	0.610889	0.60(0.30-1.22)	0.173899	0.75(0.59-0.97)	0.0396303	0.729333	17.701	0.723562	-0.0166204	0.757474	6	1.00(0.95-1.05)	0.940441	0.41
ebi-met1400-GCST90200903	Phosphate to glycerol ratio	GCST90043910	17	0.0364813	309.603	0.58(0.36-0.94)	0.0268824	0.0496393	0.55(0.29-1.04)	0.0662994	0.95(0.27-3.37)	0.935773	0.51(0.16-1.60)	0.265478	0.58(0.38-0.90)	0.0263091	0.675667	13.0845	0.666566	-0.0613122	0.431425	7	0.99(0.96-1.02)	0.630555	0.42
ebi-met1400-GCST90200912	tryptophan to tyrosine ratio	GCST90043910	27	0.0729313	646.972	1.42(1.03-1.98)	0.0345999	0.0496393	1.34(0.85-2.13)	0.210528	1.25(0.65-2.41)	0.505222	1.61(0.66-3.95)	0.307448	1.42(1.07-1.90)	0.0233177	0.800333	19.9843	0.792301	0.0195966	0.661882	7	1.00(0.97-1.04)	0.84972	0.72
ebi-met1400-GCST90200951	Mannose to fructose ratio	GCST90043910	16	0.0420472	359.92	0.49(0.32-0.76)	0.0014973	0.0440449	0.42(0.24-0.76)	0.00366991	0.55(0.21-1.43)	0.241403	0.36(0.13-1.05)	0.0799737	0.49(0.34-0.71)	0.00173871	0.809	10.4659	0.789454	-0.0145527	0.782297	8	0.99(0.96-1.02)	0.683073	0.64
ebi-met1400-GCST90200965	Glutamate to 5-oxoproline ratio	GCST90043910	23	0.0684793	600.532	0.70(0.50-0.99)	0.0461749	0.049756	0.78(0.47-1.28)	0.325143	0.69(0.30-1.56)	0.383714	0.73(0.39-1.39)	0.351751	0.70(0.53-0.92)	0.0194202	0.930333	13.7522	0.91004	0.0028962	0.963013	9	0.99(0.97-1.02)	0.707298	0.41
ebi-met1400-GCST90200974	Phosphate to proline ratio	GCST90043910	23	0.080309	719.444	0.71(0.52-0.98)	0.0367089	0.0496393	0.66(0.41-1.06)	0.0857088	0.59(0.33-1.04)	0.0845721	0.65(0.39-1.07)	0.102903	0.71(0.56-0.91)	0.0121131	0.945667	12.8429	0.937449	0.0295546	0.438357	10	0.99(0.97-1.02)	0.573641	0.43
ebi-met1400-GCST90201013	Androsterone glucuronide to etiocholanolone glucuronide ratio	GCST90043910	26	0.151837	1352.13	1.40(1.09-1.81)	0.00834806	0.0489008	1.27(0.88-1.84)	0.207499	1.38(0.93-2.05)	0.122193	1.26(0.80-1.99)	0.326919	1.40(1.10-1.79)	0.0116255	0.586667	23.4599	0.550725	0.00337225	0.914359	9	1.00(0.98-1.03)	0.80758	0.93
Blood and urine biomarkers
ukb-bub35-ALP	ALP	GCST90043910	283	0.129979	47650.5	1.36(1.05-1.76)	0.0210379	0.0496135	1.03(0.69-1.54)	0.879486	1.09(0.72-1.66)	0.674154	1.17(0.79-1.74)	0.439563	1.36(1.05-1.76)	0.0217622	0.197333	302.856	0.187984	0.00979815	0.196721	14	1.00(1.00-1.01)	0.740198	0.81
ukb-bub35-PHOS	PHOS	GCST90043910	169	0.0532769	16397.9	0.65(0.43-0.98)	0.0400688	0.0496135	0.60(0.31-1.16)	0.130566	0.48(0.24-0.98)	0.0444999	0.46(0.22-0.96)	0.041214	0.65(0.43-0.98)	0.0420902	0.154333	186.995	0.15018	0.0110419	0.311056	14	1.00(0.99-1.00)	0.431493	0.43
ukb-bub35-URMA	URMA	GCST90043910	4	0.0018763	180.104	0.12(0.01-1.00)	0.0496135	0.0496135	0.12(0.01-1.49)	0.0984465	0.10(0.00-13.02)	0.454103	0.10(0.00-2.49)	0.256701	0.12(0.02-0.62)	0.0853965	0.661667	1.806	0.613629	0.00907302	0.95174	14	1.00(0.99-1.00)	0.159521	0.13
Plasma lipidome
ebi-PL179-GCST90277238	Sterol ester (27:1/14:0) levels	GCST90043910	19	0.0622902	476.422	1.48(1.05-2.08)	0.0246913	0.0416079	1.65(1.02-2.68)	0.0412258	1.87(1.00-3.51)	0.0676115	2.07(0.98-4.40)	0.0729478	1.48(1.05-2.08)	0.0374802	0.349333	19.1567	0.382234	-0.031267	0.393741	4	0.99(0.94-1.04)	0.72398	0.75
ebi-PL179-GCST90277325	Phosphatidylcholine (O-16:1_16:0) levels	GCST90043910	18	0.0803681	512.639	0.64(0.48-0.86)	0.00318771	0.0127508	0.62(0.41-0.92)	0.0177104	0.51(0.27-0.97)	0.0556851	0.55(0.33-0.93)	0.0384593	0.64(0.51-0.82)	0.00236792	0.850333	11.6136	0.822951	0.0394812	0.437381	7	1.01(0.97-1.04)	0.750061	0.61
ebi-PL179-GCST90277339	Phosphatidylcholine (O-18:1_20:3) levels	GCST90043910	18	0.089933	675.337	0.60(0.43-0.83)	0.00247074	0.0127508	0.64(0.40-1.00)	0.0508354	0.72(0.34-1.52)	0.401651	0.72(0.45-1.15)	0.191192	0.60(0.43-0.83)	0.00760541	0.369667	18.7383	0.343756	-0.0302089	0.591769	8	1.00(0.97-1.03)	0.958116	0.76
ebi-PL179-GCST90277371	Sphingomyelin (d34:2) levels	GCST90043910	25	0.0979089	778.417	1.38(1.06-1.78)	0.015208	0.0405546	1.29(0.88-1.90)	0.186165	1.46(0.94-2.28)	0.10778	1.25(0.77-2.01)	0.375459	1.38(1.10-1.72)	0.0100774	0.782667	18.1199	0.797155	-0.0119292	0.743621	8	1.00(0.96-1.03)	0.797729	0.74
ebi-PL179-GCST90277381	Triacylglycerol (48:0) levels	GCST90043910	18	0.0727644	428.55	0.74(0.55-1.00)	0.0462312	0.0462312	0.79(0.54-1.15)	0.212076	0.84(0.46-1.55)	0.58744	0.88(0.47-1.63)	0.688229	0.74(0.59-0.93)	0.0180947	0.916667	9.87448	0.908791	-0.0216994	0.65093	4	1.00(0.95-1.05)	0.881024	0.34
ebi-PL179-GCST90277396	Triacylglycerol (52:2) levels	GCST90043910	22	0.0714621	551.509	0.64(0.43-0.95)	0.0260049	0.0416079	0.57(0.35-0.94)	0.0280992	0.68(0.30-1.53)	0.356876	0.51(0.25-1.08)	0.0930271	0.64(0.43-0.95)	0.037086	0.188333	27.1848	0.164821	-0.0077741	0.890975	5	1.01(0.97-1.04)	0.765824	0.56
ebi-PL179-GCST90277405	Triacylglycerol (54:4) levels	GCST90043910	23	0.0822346	641.827	0.71(0.52-0.97)	0.0332654	0.0443539	0.70(0.46-1.06)	0.0937187	0.61(0.23-1.64)	0.339589	0.74(0.39-1.40)	0.365138	0.71(0.56-0.89)	0.00810404	0.965667	11.7687	0.961974	0.0181427	0.759966	7	1.00(0.96-1.04)	0.965564	0.46
ebi-PL179-GCST90277416	Triacylglycerol (58:8) levels	GCST90043910	28	0.100444	712.611	0.76(0.58-0.99)	0.0408846	0.0462312	0.73(0.50-1.06)	0.0991757	0.56(0.34-0.93)	0.033061	0.69(0.39-1.22)	0.214299	0.76(0.58-0.99)	0.0495769	0.523333	26.7062	0.479731	0.0501278	0.180324	7	1.00(0.96-1.04)	0.882915	0.4
Abbreviations: IVs instrumental variables, OR odds ratio per standard deviation (SD) in genetically predicted plasma level, CI confidence interval, P_fdr adjusted p-values in the Benjamini-Hochberg procedure, MR-PRESSO Mendelian Randomization Pleiotropy RESidual Sum and Outlier. The statistical power of MR estimates was calculated via an online website (https://shiny.cnsgenomics.com/mRnd/).

## Sheet: Table S6
Table S6. Replication analyses results using an another GWAS dataset of multiple myeloma(MM) for the significant associations identified in primary analyses
id	Metabolite	Outcome(1)	MR results in primary analyses			MR results in replication anlayses
			Number of IVs	IVW		Outcome(2)	Number of IVs	IVW		MR Egger		Weighted median		Weighted mode		Heterogeneity(IVW)		Pleiotropy(Egger)		MR PRESSO
				OR (95% CI)	P			OR (95% CI)	P	OR (95% CI)	P	OR (95% CI)	P	OR (95% CI)	P	Q	P	Intercept	P	OR (95% CI)	P
Blood metabolites
ebi-met1400-GCST90199624	Hippurate levels	GCST90043910	19	1.55(1.02-2.33)	0.0380195	ukb-saige-204.4	18	1.59(1.08-2.35)	0.0197359	2.27(0.87-5.93)	0.113924	1.65(0.97-2.80)	0.0623299	1.64(0.64-4.17)	0.313488	10.8407	0.864723	-0.040967	0.440136	1.59(1.17-2.18)	0.00956026
ebi-met1400-GCST90199643	Glycodeoxycholate levels	GCST90043910	19	1.47(1.02-2.12)	0.0403292	ukb-saige-204.4	20	1.55(1.11-2.17)	0.0107163	2.39(1.13-5.04)	0.0348606	1.46(0.93-2.29)	0.10338	1.39(0.61-3.14)	0.443222	14.7671	0.737283	-0.057929	0.22004	1.55(1.15-2.08)	0.00928949
ebi-met1400-GCST90199869	3-hydroxyhippurate levels	GCST90043910	18	0.62(0.41-0.94)	0.0239216	ukb-saige-204.4	20	0.69(0.48-0.99)	0.0412201	0.52(0.24-1.15)	0.125065	0.69(0.44-1.10)	0.121241	0.70(0.29-1.71)	0.442167	10.4929	0.939722	0.0340106	0.461297	0.69(0.52-0.90)	0.0128217
ebi-met1400-GCST90199888	Cinnamoylglycine levels	GCST90043910	30	1.65(1.19-2.27)	0.00248702	ukb-saige-204.4	31	1.44(1.06-1.97)	0.0202699	1.26(0.65-2.43)	0.495617	1.59(1.05-2.43)	0.0300118	1.45(0.66-3.18)	0.356521	33.4317	0.304116	0.0194174	0.647227	1.44(1.09-1.89)	0.0149964
ebi-met1400-GCST90199919	Alliin levels	GCST90043910	19	1.34(1.03-1.75)	0.0266093	ukb-saige-204.4	18	1.29(1.01-1.65)	0.0388717	1.25(0.82-1.90)	0.30935	1.16(0.85-1.56)	0.347797	1.15(0.84-1.59)	0.393758	16.3621	0.498324	0.00762385	0.850247	1.29(1.02-1.64)	0.0504278
ebi-met1400-GCST90199961	Methionine sulfone levels	GCST90043910	35	1.33(1.07-1.65)	0.00943222	ukb-saige-204.4	33	1.29(1.05-1.58)	0.0155197	1.15(0.80-1.66)	0.449907	1.16(0.86-1.56)	0.327791	1.17(0.87-1.58)	0.292267	30.1077	0.562572	0.0197999	0.481858	1.29(1.06-1.57)	0.0179511
ebi-met1400-GCST90200168	Hydroxyasparagine levels	GCST90043910	20	1.74(1.09-2.77)	0.0198974	ukb-saige-204.4	18	1.82(1.18-2.80)	0.00624941	3.16(1.18-8.45)	0.0357205	1.46(0.81-2.63)	0.203061	1.46(0.58-3.70)	0.431315	15.3929	0.567206	-0.0615489	0.239537	1.82(1.21-2.74)	0.0105353
ebi-met1400-GCST90200193	Ethyl beta-glucopyranoside levels	GCST90043910	18	1.49(1.14-1.95)	0.00347723	ukb-saige-204.4	19	1.39(1.08-1.78)	0.009299	1.72(1.20-2.47)	0.00889687	1.58(1.16-2.16)	0.00390637	1.62(1.17-2.25)	0.00976877	16.1334	0.583239	-0.0495228	0.128042	1.39(1.10-1.76)	0.0132512
ebi-met1400-GCST90200376	Flavin adenine dinucleotide (FAD) levels	GCST90043910	22	0.73(0.58-0.92)	0.00817899	ukb-saige-204.4	22	0.75(0.60-0.94)	0.0108926	0.63(0.43-0.92)	0.0281887	0.76(0.55-1.04)	0.0810294	0.76(0.55-1.06)	0.120497	9.03192	0.988961	0.0394707	0.292331	0.75(0.65-0.86)	0.000544891
ebi-met1400-GCST90200540	X-15461 levels	GCST90043910	23	0.65(0.45-0.95)	0.0245722	ukb-saige-204.4	25	0.67(0.48-0.94)	0.0214147	0.76(0.35-1.65)	0.488211	0.63(0.39-1.01)	0.0537239	0.54(0.20-1.46)	0.235987	14.1504	0.943181	-0.0130235	0.745345	0.67(0.52-0.87)	0.00626297
ebi-met1400-GCST90200698	N2-acetyl,N6-methyllysine levels	GCST90043910	29	0.89(0.79-1.00)	0.0452722	ukb-saige-204.4	30	0.89(0.80-1.00)	0.0459112	0.94(0.81-1.09)	0.406174	0.93(0.82-1.06)	0.302403	0.93(0.83-1.06)	0.286682	27.7325	0.53225	-0.0225333	0.386988	0.89(0.80-1.00)	0.0504114
ebi-met1400-GCST90200781	Glucose to maltose ratio	GCST90043910	17	1.67(1.15-2.45)	0.00759328	ukb-saige-204.4	17	1.50(1.06-2.13)	0.0226248	1.38(0.58-3.28)	0.473541	1.67(1.04-2.69)	0.0337791	2.17(0.93-5.08)	0.0926954	11.5552	0.773989	0.0109456	0.839631	1.50(1.12-2.02)	0.0163449
ebi-met1400-GCST90200833	Cholate to adenosine 5'-monophosphate (AMP) ratio	GCST90043910	21	1.51(1.04-2.21)	0.0316329	ukb-saige-204.4	22	1.56(1.12-2.19)	0.00868006	1.33(0.67-2.67)	0.425992	1.54(0.98-2.40)	0.0597417	1.39(0.61-3.18)	0.442118	14.9973	0.823087	0.0247661	0.610749	1.56(1.18-2.08)	0.00535453
ebi-met1400-GCST90200879	Adenosine 5'-monophosphate (AMP) to glutamate ratio	GCST90043910	22	1.70(1.03-2.81)	0.0368647	ukb-saige-204.4	23	1.69(1.09-2.62)	0.0180175	2.44(0.77-7.68)	0.143346	1.74(1.01-2.99)	0.0449539	1.76(0.64-4.83)	0.285982	32.0631	0.0763267	-0.0395073	0.508271	1.69(1.09-2.62)	0.0272524
ebi-met1400-GCST90200896	Inosine to EDTA ratio	GCST90043910	23	0.75(0.57-1.00)	0.049756	ukb-saige-204.4	25	0.75(0.58-0.96)	0.0236979	0.89(0.48-1.64)	0.715081	0.69(0.48-0.99)	0.0441401	0.66(0.32-1.37)	0.272084	19.6853	0.714526	-0.0296848	0.542328	0.75(0.59-0.94)	0.0197587
ebi-met1400-GCST90200903	Phosphate to glycerol ratio	GCST90043910	17	0.58(0.36-0.94)	0.0268824	ukb-saige-204.4	18	0.59(0.39-0.91)	0.015897	0.79(0.25-2.45)	0.686867	0.56(0.32-1.00)	0.0494277	0.59(0.24-1.49)	0.281911	10.4073	0.885667	-0.0368768	0.601161	0.59(0.42-0.83)	0.00676344
ebi-met1400-GCST90200951	Mannose to fructose ratio	GCST90043910	16	0.49(0.32-0.76)	0.0014973	ukb-saige-204.4	17	0.58(0.39-0.86)	0.00653551	0.88(0.36-2.11)	0.770832	0.53(0.31-0.91)	0.0211764	0.47(0.17-1.30)	0.165318	10.9856	0.810376	-0.0492263	0.317813	0.59(0.44-0.80)	0.00336977
ebi-met1400-GCST90200965	Glutamate to 5-oxoproline ratio	GCST90043910	23	0.70(0.50-0.99)	0.0461749	ukb-saige-204.4	22	0.67(0.47-0.96)	0.0272565	0.85(0.37-1.97)	0.715738	0.77(0.48-1.25)	0.296879	0.75(0.41-1.36)	0.35888	25.0294	0.245893	-0.0409669	0.533981	0.67(0.47-0.96)	0.0385146
ebi-met1400-GCST90200974	Phosphate to proline ratio	GCST90043910	23	0.71(0.52-0.98)	0.0367089	ukb-saige-204.4	22	0.66(0.46-0.95)	0.0260503	0.32(0.14-0.74)	0.014822	0.62(0.39-1.01)	0.0538109	0.64(0.26-1.60)	0.352397	14.1785	0.861811	0.0865112	0.0728097	0.66(0.49-0.89)	0.013162
Blood and urine biomarkers
ukb-bub35-PHOS	PHOS	GCST90043910	169	0.65(0.43-0.98)	0.0400688	ukb-saige-204.4	159	0.62(0.42-0.92)	0.0177823	0.47(0.24-0.93)	0.0306007	0.58(0.31-1.09)	0.0893141	0.55(0.28-1.06)	0.0776044	169.791	0.246752	0.0101877	0.325208	0.62(0.42-0.91)	0.0168928
Plasma lipidome
ebi-PL179-GCST90277238	Sterol ester (27:1/14:0) levels	GCST90043910	19	1.48(1.05-2.08)	0.0246913	ukb-saige-204.4	18	1.60(1.14-2.25)	0.00632427	1.71(0.94-3.12)	0.100545	1.80(1.16-2.78)	0.0082119	1.91(1.09-3.33)	0.0367794	20.5509	0.247027	-0.00910197	0.801258	1.51(1.09-2.09)	0.0219416
ebi-PL179-GCST90277325	Phosphatidylcholine (O-16:1_16:0) levels	GCST90043910	18	0.64(0.48-0.86)	0.00318771	ukb-saige-204.4	18	0.69(0.52-0.90)	0.00679412	0.59(0.32-1.06)	0.0961254	0.73(0.49-1.08)	0.118677	0.60(0.35-1.03)	0.0814742	13.1265	0.727678	0.0272133	0.56496	0.69(0.54-0.87)	0.00678398
ebi-PL179-GCST90277405	Triacylglycerol (54:4) levels	GCST90043910	23	0.71(0.52-0.97)	0.0332654	ukb-saige-204.4	22	0.68(0.51-0.92)	0.0122977	0.71(0.28-1.81)	0.485422	0.74(0.49-1.13)	0.166981	0.83(0.45-1.53)	0.549027	15.6646	0.788191	-0.00526217	0.924568	0.77(0.61-0.96)	0.0280072
ebi-PL179-GCST90277416	Triacylglycerol (58:8) levels	GCST90043910	28	0.76(0.58-0.99)	0.0408846	ukb-saige-204.4	28	0.72(0.56-0.92)	0.00862715	0.61(0.39-0.98)	0.0495647	0.69(0.48-0.97)	0.0337469	0.61(0.35-1.06)	0.0932497	25.5194	0.545381	0.0261346	0.444594	0.73(0.58-0.92)	0.0120507
Abbreviations: GWAS genome-wide association study, IVs instrumental variables, OR odds ratio per standard deviation (SD) in genetically predicted plasma level, CI confidence interval, IVW inverse-variance weighted, MR-PRESSO Mendelian Randomization Pleiotropy RESidual Sum and Outlier.

## Sheet: Table S7
Table S7. Significant associations between coffee consumption and metabolomics identified in primary analyses using the inverse-variance weighted (IVW) method
id-outcome	Outcome	id-exposure	Exposure	Number of IVs	R2	F-statistics	IVW				Weighted median			MR Egger			Weighted mode			MR-PRESSO		MR-PRESSO global test P	Heterogeneity(IVW)		Pleiotropy(Egger)		Reverse MR (IVW)				Power
							Beta	SE	P	P_fdr	Beta	SE	P	Beta	SE	P	Beta	SE	P	OR (95% CI)	P		Q	P	Intercept	P	Number of IVs	Beta	SE	P
Blood metabolites
ebi-met1400-GCST90199624	Hippurate levels	ebi-fi38-GCST90096894	Coffee consumption	23	0.0137968	1469.42	0.381595	0.0909484	2.72e-05	0.000516792	0.379557	0.122044	0.00187089	0.550514	0.162307	0.00275036	0.440118	0.122128	0.00157723	1.46(1.33-1.61)	8.34103e-08	0.998667	6.31011	0.999557	-0.00801995	0.222715	12	0.00888563	0.0197176	0.652245	0.983
ebi-met1400-GCST90199869	3-hydroxyhippurate levels	ebi-fi38-GCST90096894	Coffee consumption	23	0.0140733	1499.29	0.298618	0.091263	0.00106766	0.00956668	0.404312	0.117144	0.000557682	0.531048	0.16421	0.00397718	0.408665	0.124084	0.00331315	1.35(1.17-1.55)	0.000469898	0.886667	13.9959	0.901624	-0.0108414	0.1034	12	-0.0163437	0.0192979	0.397041	0.895
ebi-met1400-GCST90199888	Cinnamoylglycine levels	ebi-fi38-GCST90096894	Coffee consumption	24	0.0143944	1534	0.283599	0.0893884	0.00151053	0.00956668	0.338168	0.126275	0.00740588	0.480324	0.161739	0.00707297	0.394689	0.118672	0.00294105	1.33(1.13-1.56)	0.0025194	0.596333	20.1465	0.633061	-0.00924511	0.158572	19	0.013333	0.0134822	0.322697	0.853
ebi-met1400-GCST90199869	3-hydroxyhippurate levels	ebi-fi38-GCST90096908	Decaffeinated coffee consumption	13	0.0061446	383.753	0.313059	0.141409	0.0268392	0.0268392	0.378199	0.193999	0.0512366	0.681562	0.488492	0.190474	0.668017	0.297593	0.0444166	1.37(1.04-1.79)	0.0433184	0.457	11.5289	0.484213	-0.0156482	0.447282	12	-0.03173	0.0216538	0.14283	0.606
ebi-met1400-GCST90199624	Hippurate levels	ebi-fi38-GCST90096913	Ground coffee consumption	18	0.00993089	724.945	0.368205	0.108067	0.000656371	0.00262548	0.43597	0.164922	0.00820542	0.679531	0.228455	0.00894318	0.516806	0.162858	0.00555712	1.45(1.19-1.76)	0.00194094	0.57	14.736	0.614493	-0.0150916	0.141475	12	-0.0252106	0.0224897	0.262294	0.915
ebi-met1400-GCST90199869	3-hydroxyhippurate levels	ebi-fi38-GCST90096913	Ground coffee consumption	18	0.00967744	706.262	0.292465	0.110597	0.00818306	0.0136442	0.453298	0.159616	0.00451239	0.692933	0.229492	0.00814273	0.498223	0.162996	0.00713689	1.34(1.12-1.61)	0.00618905	0.745333	12.1875	0.788655	-0.0195262	0.0637762	12	0.0143094	0.0200671	0.475797	0.743
ebi-met1400-GCST90199888	Cinnamoylglycine levels	ebi-fi38-GCST90096913	Ground coffee consumption	20	0.0105313	769.243	0.221642	0.108408	0.0409032	0.0409032	0.293819	0.165321	0.0755251	0.559568	0.227322	0.0241589	0.389393	0.184764	0.0485854	1.25(1.01-1.54)	0.0550114	0.327667	20.1737	0.384197	-0.0158642	0.11083	19	0.00225747	0.0146434	0.877482	0.521
ebi-met1400-GCST90199919	Alliin levels	ebi-fi38-GCST90096913	Ground coffee consumption	19	0.0102438	748.025	-0.308017	0.119951	0.0102331	0.0136442	-0.295657	0.161972	0.0679469	-0.421724	0.258181	0.120759	-0.346848	0.17788	0.0669403	0.73(0.64-0.85)	0.000600022	0.992667	6.88792	0.991038	0.00543497	0.625313	15	0.00872779	0.0112227	0.436752	0.711
ebi-met1400-GCST90199624	Hippurate levels	ebi-fi38-GCST90096914	Instant coffee consumption	38	0.00927441	1692.16	0.414059	0.110826	0.000186888	0.00073426	0.50943	0.166434	0.00220708	0.730001	0.212989	0.00154049	0.603242	0.163055	0.000698285	1.51(1.33-1.73)	3.98382e-07	0.999	13.6728	0.999836	-0.0098397	0.090928	12	-4.29e-05	0.00354933	0.990355	0.952
ebi-met1400-GCST90199869	3-hydroxyhippurate levels	ebi-fi38-GCST90096914	Instant coffee consumption	45	0.0100867	1841.87	0.257378	0.108322	0.0174995	0.019288	0.506049	0.173882	0.00361071	0.556836	0.211052	0.0115527	0.524169	0.160034	0.00206176	1.29(1.12-1.49)	0.00088855	0.998667	19.5351	0.999482	-0.00878218	0.105564	12	-0.00346724	0.00396008	0.381276	0.65
ebi-met1400-GCST90199888	Cinnamoylglycine levels	ebi-fi38-GCST90096914	Instant coffee consumption	33	0.00893534	1629.73	0.300683	0.113618	0.00813457	0.0158958	0.339159	0.165738	0.0407216	0.53236	0.213269	0.0180807	0.589655	0.169478	0.00147304	1.35(1.15-1.59)	0.000853557	0.973667	16.553	0.988954	-0.00747657	0.20878	19	0.00405286	0.00346114	0.241614	0.71
ebi-met1400-GCST90199869	3-hydroxyhippurate levels	ebi-fl187-GCST90094739	Coffee max liking	20	0.0175386	2838.49	0.165131	0.0834982	0.0479669	0.0479669	0.174676	0.110577	0.11418	0.388907	0.219485	0.093338	0.364455	0.1884	0.0680868	1.18(1.06-1.31)	0.00734993	0.974333	8.25288	0.98394	-0.0134873	0.284794	19	0.0164506	0.0317918	0.604844	0.51
Abbreviations: IVs instrumental variables, OR odds ratio per standard deviation (SD) in genetically predicted plasma level, CI confidence interval, P_fdr adjusted p-values in the Benjamini-Hochberg procedure, MR-PRESSO Mendelian Randomization Pleiotropy RESidual Sum and Outlier. The statistical power of MR estimates was calculated via an online website (https://sb452.shinyapps.io/power/).

## Sheet: Table S8
Table S8. Colocalization analyses for the significant associations between coffee consumption and blood metabolites identified in primary analyses
id-exposure	id-outcome	Exposure	Outcome	nsnps	PPH0	PPH1	PPH2	PPH3	PPH4
ebi-fi38-GCST90096894	ebi-met1400-GCST90199624	Coffee consumption	Hippurate levels	141	1.70487e-88	0.142692	3.58713e-90	0.00214713	0.855161
ebi-fi38-GCST90096894	ebi-met1400-GCST90199869	Coffee consumption	3-hydroxyhippurate levels	141	6.64263e-88	0.555964	9.70256e-90	0.00768434	0.436351
ebi-fi38-GCST90096894	ebi-met1400-GCST90199888	Coffee consumption	Cinnamoylglycine levels	141	3.51e-88	0.293779	5.83e-90	0.00417829	0.702043
ebi-fi38-GCST90096908	ebi-met1400-GCST90199869	Decaffeinated coffee consumption	3-hydroxyhippurate levels	141	1.52328e-10	0.714466	1.07755e-12	0.00477329	0.28076
ebi-fi38-GCST90096913	ebi-met1400-GCST90199624	Ground coffee consumption	Hippurate levels	126	2.75329e-37	0.899448	7.28158e-39	0.0237107	0.0768418
ebi-fi38-GCST90096913	ebi-met1400-GCST90199869	Ground coffee consumption	3-hydroxyhippurate levels	126	2.65383e-37	0.866954	1.30633e-38	0.0425848	0.0904614
ebi-fi38-GCST90096913	ebi-met1400-GCST90199888	Ground coffee consumption	Cinnamoylglycine levels	126	2.95301e-37	0.964692	2.78179e-39	0.00906132	0.0262462
ebi-fi38-GCST90096913	ebi-met1400-GCST90199919	Ground coffee consumption	Alliin levels	126	2.85298e-37	0.932014	2.62755e-39	0.00852423	0.0594614
ebi-fi38-GCST90096914	ebi-met1400-GCST90199624	Instant coffee consumption	Hippurate levels	141	2.2666e-88	0.186507	3.42676e-90	0.00200823	0.811484
ebi-fi38-GCST90096914	ebi-met1400-GCST90199869	Instant coffee consumption	3-hydroxyhippurate levels	141	8.68277e-88	0.714463	6.14208e-90	0.00477326	0.280764
ebi-fi38-GCST90096914	ebi-met1400-GCST90199888	Instant coffee consumption	Cinnamoylglycine levels	141	4.79797e-88	0.394802	3.91354e-90	0.00261768	0.60258
Abbreviations: IV instrumental variable, PP posterior probability. Colocalization was conducted for each food intake-metabolite pair in each IV's corresponding genomic locu using the R package coloc. Loci showing a moderate colocalization with a posterior probability (PP4>0.5) are presented.

## Sheet: Table S9
Table S9. Mediation analyses of metabolites in the associations between coffee consumption and multiple myeloma(MM)
id-exposure	id-mediator	Exposure	Mediator	Outcome	Total effect (Beta)	A (Beta)	B (Beta)	Intermediary effect (Beta)	Mediation effect/ Total effect	P
ebi-fi38-GCST90096894	ebi-met1400-GCST90199624	Coffee consumption	Hippurate levels	GCST90043910	1.00147	0.381595	0.932966	0.356015	0.355492	7.58957e-05
ebi-fi38-GCST90096894	ebi-met1400-GCST90199869	Coffee consumption	3-hydroxyhippurate levels	GCST90043910	1.00147	0.298618	-0.225512	-0.0673419	-0.067243	0.0220329
ebi-fi38-GCST90096894	ebi-met1400-GCST90199888	Coffee consumption	Cinnamoylglycine levels	GCST90043910	1.00147	0.283599	0.771657	0.218841	0.218519	0.00176991
ebi-fi38-GCST90096908	ebi-met1400-GCST90199869	Decaffeinated coffee consumption	3-hydroxyhippurate levels	GCST90043910	1.95941	0.313059	-0.461428	-0.144454	-0.0737233	0.0456145
ebi-fi38-GCST90096913	ebi-met1400-GCST90199624	Ground coffee consumption	Hippurate levels	GCST90043910	1.39646	0.368205	-0.332648	-0.122483	-0.0877094	0.022785
ebi-fi38-GCST90096913	ebi-met1400-GCST90199869	Ground coffee consumption	3-hydroxyhippurate levels	GCST90043910	1.39646	0.292465	-0.434176	-0.126981	-0.0909307	0.0249972
ebi-fi38-GCST90096913	ebi-met1400-GCST90199888	Ground coffee consumption	Cinnamoylglycine levels	GCST90043910	1.39646	0.221642	0.795708	0.176362	0.126292	0.0421029
ebi-fi38-GCST90096913	ebi-met1400-GCST90199919	Ground coffee consumption	Alliin levels	GCST90043910	1.39646	-0.308017	0.27879	-0.0858721	-0.0614927	0.0106
ebi-fi38-GCST90096914	ebi-met1400-GCST90199624	Instant coffee consumption	Hippurate levels	GCST90043910	1.47652	0.414059	0.764033	0.316355	0.214257	0.000328215
ebi-fi38-GCST90096914	ebi-met1400-GCST90199869	Instant coffee consumption	3-hydroxyhippurate levels	GCST90043910	1.47652	0.257378	0.251997	0.0648584	0.0439265	0.0314577
ebi-fi38-GCST90096914	ebi-met1400-GCST90199888	Instant coffee consumption	Cinnamoylglycine levels	GCST90043910	1.47652	0.300683	0.431558	0.129762	0.0878838	0.00992981
ebi-fl187-GCST90094739	ebi-met1400-GCST90199869	Coffee max liking	3-hydroxyhippurate levels	GCST90043910	1.07753	0.165131	-0.266716	-0.0440431	-0.0408741	0.083984
ebi-fi38-GCST90096894	ebi-met1400-GCST90199624	Coffee consumption	Hippurate levels	ukb-saige-204.4	0.898738	0.381595	0.771218	0.294293	0.327451	0.000103676
ebi-fi38-GCST90096894	ebi-met1400-GCST90199869	Coffee consumption	3-hydroxyhippurate levels	ukb-saige-204.4	0.898738	0.298618	-0.147523	-0.0440529	-0.0490164	0.0684643
ebi-fi38-GCST90096894	ebi-met1400-GCST90199888	Coffee consumption	Cinnamoylglycine levels	ukb-saige-204.4	0.898738	0.283599	0.300948	0.0853484	0.0949648	0.0035038
ebi-fi38-GCST90096914	ebi-met1400-GCST90199624	Instant coffee consumption	Hippurate levels	ukb-saige-204.4	1.23173	0.414059	0.255124	0.105636	0.0857628	0.00363446
ebi-fi38-GCST90096914	ebi-met1400-GCST90199869	Instant coffee consumption	3-hydroxyhippurate levels	ukb-saige-204.4	1.23173	0.257378	-0.035565	-0.00915365	-0.00743156	0.469114
ebi-fi38-GCST90096914	ebi-met1400-GCST90199888	Instant coffee consumption	Cinnamoylglycine levels	ukb-saige-204.4	1.23173	0.300683	0.266009	0.0799844	0.0649368	0.0126162

## Sheet: Table S10
Table S10. Metabolic pathways involved in the 24 significant associations between metabolites and multiple myeloma(MM) identified in primary analyses
	total	expected	hits	Raw p	Holm p	FDR
Glycerol Phosphate Shuttle	11	0.0439	3	3.92e-06	0.000385	0.000385
Citric Acid Cycle	32	0.128	3	0.000116	0.0113	0.00569
Warburg Effect	57	0.228	3	0.000672	0.0645	0.0219
Vitamin B6 Metabolism	19	0.0758	2	0.002	0.19	0.03
Mitochondrial Electron Transport Chain	19	0.0758	2	0.002	0.19	0.03
Glutathione Metabolism	20	0.0798	2	0.00222	0.206	0.03
Riboflavin Metabolism	20	0.0798	2	0.00222	0.206	0.03
Betaine Metabolism	21	0.0838	2	0.00245	0.223	0.03
Glycerolipid Metabolism	25	0.0998	2	0.00348	0.313	0.0369
Plasmalogen Synthesis	26	0.104	2	0.00376	0.335	0.0369
Phospholipid Biosynthesis	29	0.116	2	0.00468	0.412	0.0383
Folate Metabolism	29	0.116	2	0.00468	0.412	0.0383
Ammonia Recycling	31	0.124	2	0.00535	0.46	0.0403
Nicotinate and Nicotinamide Metabolism	35	0.14	2	0.00681	0.579	0.0445
Aspartate Metabolism	35	0.14	2	0.00681	0.579	0.0445
Propanoate Metabolism	42	0.168	2	0.00976	0.81	0.0531
Methionine Metabolism	42	0.168	2	0.00976	0.81	0.0531
Histidine Metabolism	42	0.168	2	0.00976	0.81	0.0531
Pyruvate Metabolism	47	0.188	2	0.0122	0.974	0.0592
Steroid Biosynthesis	48	0.192	2	0.0127	1	0.0592
Glutamate Metabolism	48	0.192	2	0.0127	1	0.0592
Arginine and Proline Metabolism	52	0.208	2	0.0148	1	0.066
Pyrimidine Metabolism	57	0.228	2	0.0177	1	0.0743
Glycine and Serine Metabolism	59	0.236	2	0.0189	1	0.0743
Valine, Leucine and Isoleucine Degradation	59	0.236	2	0.0189	1	0.0743
Bile Acid Biosynthesis	65	0.259	2	0.0228	1	0.0861
Purine Metabolism	73	0.291	2	0.0285	1	0.104
Thiamine Metabolism	9	0.0359	1	0.0355	1	0.116
Lactose Degradation	9	0.0359	1	0.0355	1	0.116
De Novo Triacylglycerol Biosynthesis	9	0.0359	1	0.0355	1	0.116
Pyruvaldehyde Degradation	10	0.0399	1	0.0394	1	0.125
D-Arginine and D-Ornithine Metabolism	11	0.0439	1	0.0433	1	0.125
Trehalose Degradation	11	0.0439	1	0.0433	1	0.125
Cardiolipin Biosynthesis	11	0.0439	1	0.0433	1	0.125
Vitamin K Metabolism	13	0.0519	1	0.051	1	0.139
Thyroid hormone synthesis	13	0.0519	1	0.051	1	0.139
Alanine Metabolism	17	0.0679	1	0.0663	1	0.171
Phosphatidylinositol Phosphate Metabolism	17	0.0679	1	0.0663	1	0.171
Spermidine and Spermine Biosynthesis	18	0.0719	1	0.07	1	0.176
Butyrate Metabolism	19	0.0758	1	0.0738	1	0.176
Lactose Synthesis	19	0.0758	1	0.0738	1	0.176
Threonine and 2-Oxobutanoate Degradation	20	0.0798	1	0.0776	1	0.181
Sulfate/Sulfite Metabolism	22	0.0878	1	0.0851	1	0.189
Transfer of Acetyl Groups into Mitochondria	22	0.0878	1	0.0851	1	0.189
Caffeine Metabolism	23	0.0918	1	0.0888	1	0.189
Glycolysis	23	0.0918	1	0.0888	1	0.189
Inositol Phosphate Metabolism	24	0.0958	1	0.0926	1	0.193
Cysteine Metabolism	26	0.104	1	0.1	1	0.195
Phenylalanine and Tyrosine Metabolism	27	0.108	1	0.104	1	0.195
Selenoamino Acid Metabolism	27	0.108	1	0.104	1	0.195
Mitochondrial Beta-Oxidation of Short Chain Saturated Fatty Acids	27	0.108	1	0.104	1	0.195
Mitochondrial Beta-Oxidation of Medium Chain Saturated Fatty Acids	27	0.108	1	0.104	1	0.195
Urea Cycle	28	0.112	1	0.107	1	0.195
Mitochondrial Beta-Oxidation of Long Chain Saturated Fatty Acids	28	0.112	1	0.107	1	0.195
Pentose Phosphate Pathway	29	0.116	1	0.111	1	0.196
Inositol Metabolism	30	0.12	1	0.115	1	0.196
Lysine Degradation	30	0.12	1	0.115	1	0.196
Starch and Sucrose Metabolism	31	0.124	1	0.118	1	0.196
Fructose and Mannose Degradation	31	0.124	1	0.118	1	0.196
Amino Sugar Metabolism	33	0.132	1	0.126	1	0.202
Gluconeogenesis	33	0.132	1	0.126	1	0.202
Beta-Alanine Metabolism	34	0.136	1	0.129	1	0.204
Galactose Metabolism	38	0.152	1	0.143	1	0.223
Porphyrin Metabolism	40	0.16	1	0.151	1	0.227
Sphingolipid Metabolism	40	0.16	1	0.151	1	0.227
Fatty acid Metabolism	43	0.172	1	0.161	1	0.239
Tryptophan Metabolism	59	0.236	1	0.216	1	0.316
Tyrosine Metabolism	70	0.279	1	0.252	1	0.363

[truncated: 4 more sheets: Table S11, Table S12, Table S13, Table S14]
